# Supplementary material for: Large-scale neuroanatomical study uncovers 198 gene associations in mouse brain morphogenesis
Source: PubMed Central journal article supplement (PMC6671969; doi:10.1038/s41467-019-11431-2), 2019-08-01
Supplement: 41467_2019_11431_MOESM13_ESM.pdf [file 41467_2019_11431_MOESM13_ESM.pdf]

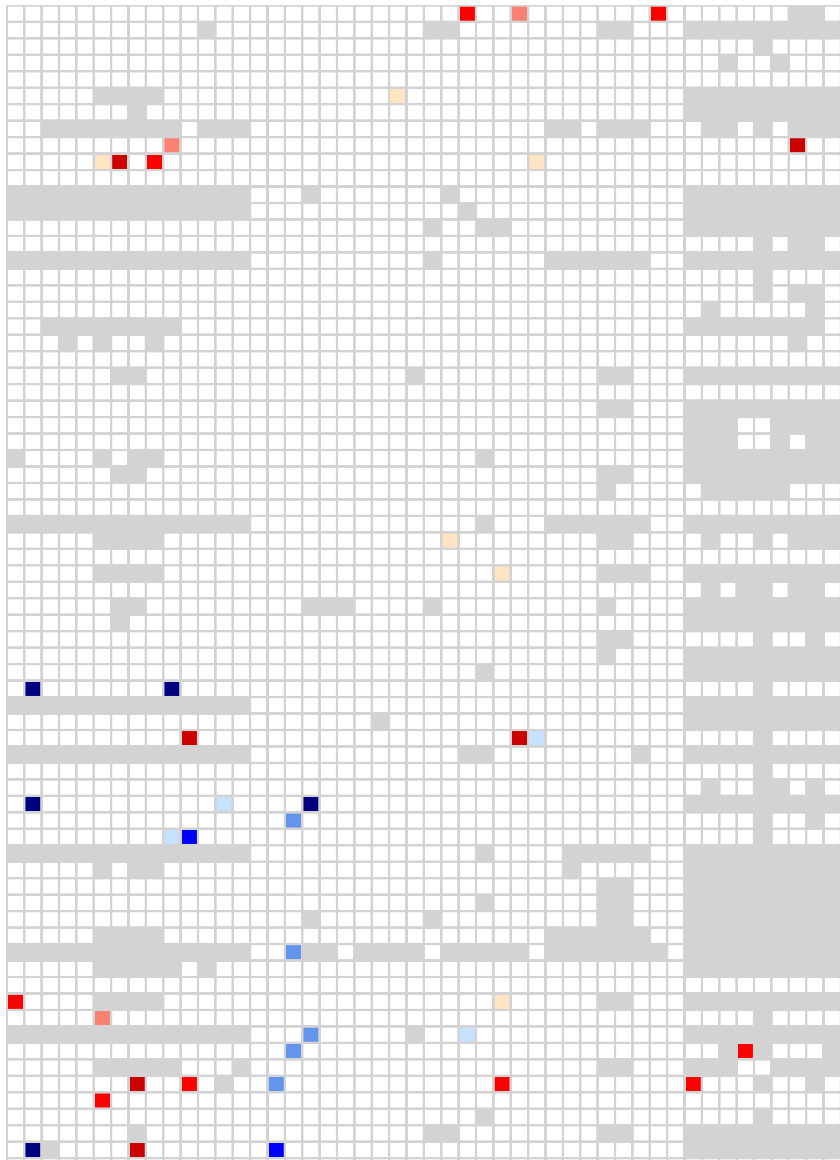

1110059G10Rik\_HOM\_tm1a (Coronal)  
 1500011B03Rik\_HOM\_tm2 (Coronal)  
 1700001C02Rik\_HOM\_tm1a (Coronal)  
 1700007K13Rik\_HOM\_tm2b (Coronal)  
 1700008O03Rik\_HOM\_tm1a (Coronal)  
 1700024P04Rik\_HOM\_tm1b (Coronal)  
 1700029H14Rik\_HOM\_tm2b (Coronal)  
 1700034J05Rik\_HOM\_tm1a (Coronal)  
 1700067K01Rik\_HET\_tm2a (Coronal)  
 1700123O20Rik\_HOM\_tm1a (Coronal)  
 2010300C02Rik\_HOM\_tm1b (Coronal)  
 2210016L21Rik\_HOM\_tm1a (Coronal)  
 2310007B03Rik\_HOM\_tm1a (Coronal)  
 2310057J18Rik\_HOM\_tm1a (Coronal)  
 2610318N02Rik\_HOM\_tm1b (Coronal)  
 3110001I22Rik\_HOM\_tm1a (Coronal)  
 3110035E14Rik\_HOM\_tm1a (Coronal)  
 3110035E14Rik\_HOM\_tm1b (Coronal)  
 3300002A11Rik\_HOM\_tm1a (Coronal)  
 3830406C13Rik\_HOM\_tm1b (Coronal)  
 3830417A13Rik\_HEMI\_tm1a (Coronal)  
 4921536K21Rik\_HOM\_tm1a (Coronal)  
 4930404H24Rik\_HOM\_tm1a (Coronal)  
 4930449E01Rik\_HOM\_tm1a (Coronal)  
 4930590J08Rik\_HOM\_tm1a (Coronal)  
 4930591A17Rik\_HOM\_tm1a (Coronal)  
 4931429L15Rik\_HOM\_tm1a (Coronal)  
 4932414N04Rik\_HOM\_tm1a (Coronal)  
 4932431P20Rik\_HOM\_em1 (Coronal)  
 4932438H23Rik\_HOM\_tm1a (Coronal)  
 4933402N03Rik\_HOM\_tm2a (Coronal)  
 4933425L06Rik\_HOM\_tm1a (Coronal)  
 4933434E20Rik\_HET\_tm1a (Coronal)  
 9130011E15Rik\_HET\_tm1a (Coronal)  
 9330182L06Rik\_HOM\_tm1a (Coronal)  
 A430005L14Rik\_HOM\_tm1a (Coronal)  
 A430078G23Rik\_HOM\_tm1a (Coronal)  
 A730017C20Rik\_HOM\_tm1b (Coronal)  
 A830019P07Rik\_HOM\_tm1a (Coronal)

Abca4\_HET\_tm1a (Coronal)  
 Abca4\_HOM\_tm1a (Coronal)  
 Abcb6\_HOM\_tm1a (Coronal)  
 Abcd1\_HEMI\_tm1a (Coronal)  
 Abhd14a\_HOM\_tm2a (Coronal)  
 Abhd17a\_HOM\_tm1a (Coronal)  
 Abhd5\_HOM\_tm1a (Coronal)  
 Abtb2\_HOM\_tm1a (Coronal)  
 Acaa1a\_HOM\_tm1a (Coronal)  
 Acbd5\_HOM\_tm1b (Coronal)  
 Acer1\_HOM\_tm1a (Coronal)  
 Acot5\_HOM\_tm1a (Coronal)  
 Acot6\_HOM\_tm1a (Coronal)  
 Acs14\_HEMI\_tm1a (Coronal)  
 Act10\_HOM\_tm1a (Coronal)  
 Actn4\_HET\_tm1a (Coronal)  
 Actr6\_HET\_tm1a (Coronal)  
 Adal\_HOM\_tm1a (Coronal)  
 Adam17\_HET\_tm1a (Coronal)  
 Adam3\_HOM\_tm1 (Coronal)  
 Adamts19\_HOM\_tm4a (Coronal)  
 Adamts3\_HET\_tm1b (Coronal)  
 Adap1\_HOM\_tm1a (Coronal)  
 Adar\_HET\_tm1a (Coronal)  
 Adcy2\_HOM\_tm1a (Coronal)  
 Adcy9\_HET\_tm1b (Coronal)  
 Adgrb1\_HOM\_tm2a (Coronal)  
 Adgrd1\_HOM\_tm1b (Coronal)  
 Adpgk\_HOM\_tm2a (Coronal)  
 Aff3\_HET\_tm1a (Coronal)  
 Aff3\_HOM\_tm1a (Coronal)

1\_TBA  
 1\_LV  
 1\_Cg  
 1\_Cg\_Width  
 1\_Cg\_Height  
 1\_gcc  
 1\_gcc\_Width\_I  
 1\_gcc\_Width\_B  
 1\_gcc\_Height  
 1\_CPU  
 1\_aca  
 1\_Pir  
 1\_M1  
 1\_S2  
 2\_TBA  
 2\_LV  
 2\_D3V  
 2\_RSgc  
 2\_RSgc\_Width  
 2\_RSgc\_Height  
 2\_cc  
 2\_cc\_Width  
 2\_dhc  
 2\_Height  
 2\_AM  
 2\_Pir  
 2\_Ic  
 2\_opt  
 2\_rir  
 2\_lli  
 2\_Hb  
 2\_HP  
 2\_TILpy  
 2\_DG  
 2\_Mol  
 2\_Rad  
 2\_Rad  
 2\_Or  
 2\_M1  
 2\_S2  
 2\_S2  
 3\_TBA  
 3\_4V  
 3\_Pons  
 3\_Py  
 3\_g7  
 3\_CN  
 3\_Lat  
 3\_IntA  
 3\_IGL

Increase  
 Decrease

|                   |                   |
|-------------------|-------------------|
| ■ [0;0.1[         | ■ [0;0.1[         |
| ■ [0.1;0.2[       | ■ [0.1;0.2[       |
| ■ [0.2;0.25[      | ■ [0.2;0.25[      |
| ■ [0.25;0.3[      | ■ [0.25;0.3[      |
| □ [0.3;+infinity[ | □ [0.3;+infinity[ |

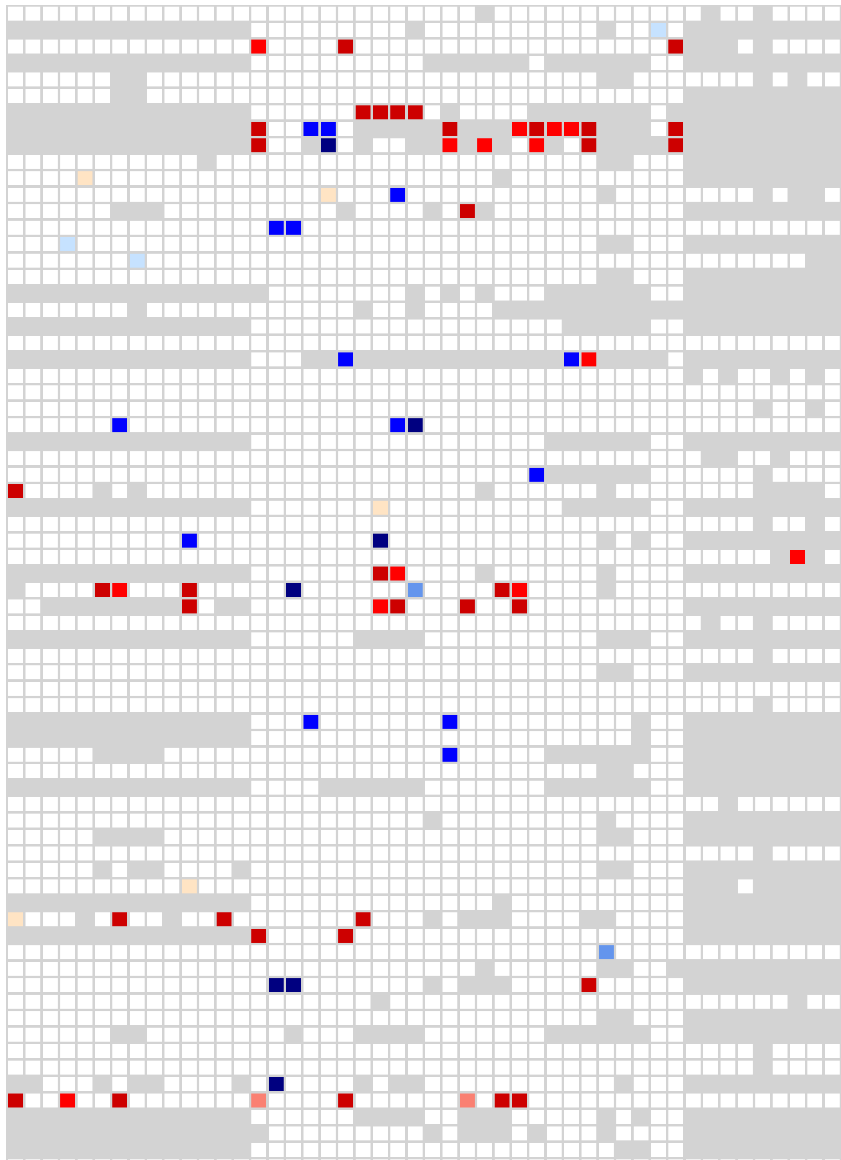

Agap1\_HOM\_tm1a (Coronal)  
 Ago1\_HOM\_tm1a (Coronal)  
 Ago3\_HOM\_tm1a (Coronal)  
 Atpat3\_HET\_tm1a (Coronal)  
 Ahcy1\_HOM\_tm1a (Coronal)  
 Aicda\_HOM\_tm1b (Coronal)  
 Akap9\_HET\_tm1a (Coronal)  
 Akt2\_HET\_tm1e (Coronal)  
 Akt2\_HOM\_tm1e (Coronal)  
 Aldh16a1\_HOM\_tm1a (Coronal)  
 Aldh18a1\_HET\_tm1a (Coronal)  
 Aldh1b1\_HOM\_tm2a (Coronal)  
 Aldh2\_HOM\_tm1a (Coronal)  
 Aldh3b1\_HOM\_tm1b (Coronal)  
 Alg13\_HEML\_tm1a (Coronal)  
 Alox12e\_HOM\_tm1b (Coronal)  
 Alpk1\_HOM\_em1 (Coronal)  
 Amfr\_HET\_tm1a (Coronal)  
 Amot1\_HOM\_tm1a (Coronal)  
 Ampd3\_HOM\_tm2a (Coronal)  
 Amz2\_HOM\_tm1e (Coronal)  
 Ankrd13a\_HOM\_Gt (Coronal)  
 Ankrd13d\_HOM\_tm1a (Coronal)  
 Ankrd6\_HOM\_tm1b (Coronal)  
 Ankrd9\_HOM\_tm1 (Coronal)  
 Anks1b\_HOM\_tm1a (Coronal)  
 Anks4b\_HOM\_tm2a (Coronal)  
 Anks6\_HET\_tm1b (Coronal)  
 Ano10\_HOM\_tm1a (Coronal)  
 Anp32e\_HOM\_tm1e (Coronal)  
 Anxa6\_HOM\_tm1a (Coronal)  
 Anxa9\_HOM\_tm1b (Coronal)  
 Ap2a2\_HET\_em1 (Coronal)  
 Ap2a2\_HET\_em1 (Coronal)  
 Ap4e1\_HOM\_tm1a (Coronal)  
 Ap4e1\_HOM\_tm1b (Coronal)  
 Ap4m1\_HOM\_tm1b (Coronal)  
 Apip\_HOM\_tm1b (Coronal)  
 Apoe\_HET\_tm1Unc (Coronal)  
 Apol7a\_HOM\_tm1a (Coronal)  
 Apol9b\_HOM\_tm2a (Coronal)  
 Apoo\_HEML\_tm1b (Coronal)  
 Apool\_HEML\_tm1a (Coronal)  
 Appl2\_HOM\_tm1a (Coronal)  
 Appl2\_HOM\_tm1a (Coronal)  
 Arap2\_HOM\_tm2b (Coronal)  
 Arhgap17\_HOM\_tm1b (Coronal)  
 Arhgap18\_HOM\_tm1a (Coronal)  
 Arhgap22\_HOM\_tm1a (Coronal)  
 Arhgap25\_HOM\_tm1a (Coronal)  
 Arhgef1\_HOM\_tm1a (Coronal)  
 Arhgef38\_HOM\_tm1a (Coronal)  
 Arhgef7\_HET\_tm1a (Coronal)  
 Arid1b\_HET\_tm1b (Coronal)  
 Arid2\_HET\_tm1a (Coronal)  
 Arid4a\_HOM\_tm1a (Coronal)  
 Arl4d\_HOM\_tm1a (Coronal)  
 Armc7\_HET\_tm1.1 (Coronal)  
 Arpc1b\_HOM\_tm1a (Coronal)  
 Arpc2\_HET\_tm1a (Coronal)  
 Arpc3\_HET\_tm1a (Coronal)  
 Arpin\_HOM\_tm1b (Coronal)  
 Arrdc5\_HOM\_tm1b (Coronal)  
 Arsg\_HOM\_tm1a (Coronal)  
 Art4\_HOM\_tm1a (Coronal)  
 Arvcf\_HOM\_tm1a (Coronal)  
 Aspm\_HOM\_tm1a (Coronal)  
 Aste1\_HOM\_tm1a (Coronal)  
 Asxl1\_HET\_tm1a (Coronal)  
 Asxl1\_HET\_tm1a (Coronal)

1\_TBA  
 1\_LV  
 1\_Cg  
 1\_Cg\_Width  
 1\_Cg\_Height  
 1\_gcc  
 1\_gcc\_Width\_I  
 1\_gcc\_Width\_B  
 1\_gcc\_Height  
 1\_CPu  
 1\_aca  
 1\_Pir  
 1\_M1  
 1\_S2  
 2\_TBA  
 2\_LV  
 2\_D3V  
 2\_RSgc  
 2\_RSgc\_Width  
 2\_RSgc\_Height  
 2\_cc  
 2\_cc\_Width  
 2\_dhc  
 2\_AM  
 2\_Pir  
 2\_ic  
 2\_opt  
 2\_rlr  
 2\_lli  
 2\_HP  
 2\_HB  
 2\_DG  
 2\_Tlly  
 2\_Mol  
 2\_Rad  
 2\_Or  
 2\_M1  
 2\_S2  
 3\_TBA  
 3\_4V  
 3\_Pois  
 3\_Py  
 3\_g7  
 3\_CN  
 3\_Lat  
 3\_IntA  
 3\_IgI

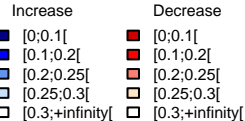

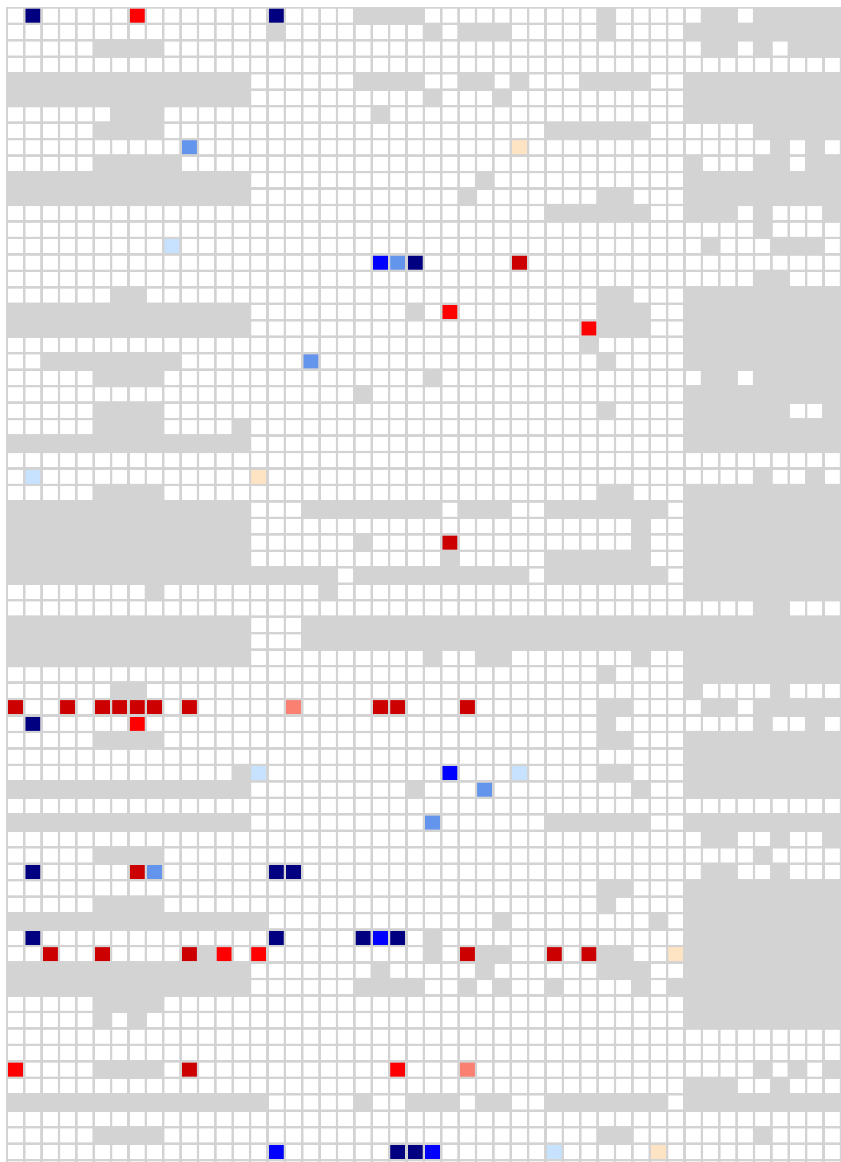

Atad3a\_HET\_tm1a (Coronal)  
 Atg16l1\_HET\_tm1a (Coronal)  
 Atg16l2\_HOM\_tm1a (Coronal)  
 Atp11a\_HET\_tm1a (Coronal)  
 Atp2b2\_HET\_Obv (Coronal)  
 Atp5a1\_HET\_tm1a (Coronal)  
 Atp5e\_HET\_tm1b (Coronal)  
 Atp5f1\_HET\_tm1b (Coronal)  
 Atp8b2\_HET\_tm1a (Coronal)  
 Atp8b2\_HOM\_tm1a (Coronal)  
 Atpaf2\_HET\_tm1a (Coronal)  
 Atpif1\_HOM\_tm1a (Coronal)  
 Atxn10\_HET\_tm1b (Coronal)  
 Atxn3\_HOM\_tm1a (Coronal)  
 B9d2\_HET\_tm1a (Coronal)  
 Bach2\_HOM\_tm1a (Coronal)  
 Bap1\_HET\_tm1a (Coronal)  
 Barhl1\_HET\_tm1 (Coronal)  
 Baz1b\_HET\_tm2a (Coronal)  
 Bbx\_HOM\_tm1a (Coronal)  
 Bdh2\_HOM\_tm1a (Coronal)  
 Bhlhe40\_HOM\_tm1b (Coronal)  
 Bivm\_HOM\_tm1b (Coronal)  
 Blzf1\_HOM\_tm1a (Coronal)  
 Bnip2\_HOM\_tm1b (Coronal)  
 Bpgm\_HOM\_tm1a (Coronal)  
 Bpifa3\_HOM\_tm1a (Coronal)  
 Bpifb1\_HOM\_tm1e (Coronal)  
 Bpifb5\_HOM\_tm2a (Coronal)  
 Brd2\_HET\_em1 (Coronal)  
 Brd7\_HET\_tm2a (Coronal)  
 Brd8\_HET\_tm1a (Coronal)  
 Brdt\_HOM\_tm1a (Coronal)  
 Brpf3\_HET\_tm1a (Coronal)  
 Brpf3\_HET\_tm1a (Coronal)  
 Btbdl11\_HOM\_tm1a (Coronal)  
 Cabp1\_HOM\_tm1a (Coronal)  
 Cadm1\_HET\_tm1.2 (Coronal)  
 Cadm1\_HOM\_tm1.2 (Coronal)  
 Cadm1\_HOM\_tm1a (Coronal)  
 Calcoco2\_HOM\_tm1 (Coronal)  
 Camkmt\_HOM\_tm1b (Coronal)  
 Camsap3\_HOM\_tm1a (Coronal)  
 Cand2\_HOM\_tm1a (Coronal)  
 Capn11\_HOM\_tm1b (Coronal)  
 Caprin2\_HOM\_tm1a (Coronal)  
 Capza2\_HET\_tm1b (Coronal)  
 Capzb\_HET\_tm1a (Coronal)  
 Card9\_HOM\_tm1a (Coronal)  
 Carmil1\_HOM\_tm1a (Coronal)  
 Casc4\_HOM\_tm2b (Coronal)  
 Casp12\_HOM\_tm1a (Coronal)  
 Catip\_HOM\_tm1b (Coronal)  
 Catspere2\_HOM\_tm1b (Coronal)  
 Cbr2\_HOM\_tm1b (Coronal)  
 Cbx1\_HET\_tm1a (Coronal)  
 Cbx5\_HOM\_tm1a (Coronal)  
 Cbx6\_HOM\_tm1a (Coronal)  
 Cbx7\_HOM\_tm1a (Coronal)  
 Cc2d1b\_HOM\_tm1a (Coronal)  
 Cc2d2a\_HET\_tm1a (Coronal)  
 Ccdc106\_HOM\_tm1a (Coronal)  
 Ccdc122\_HET\_tm1a (Coronal)  
 Ccdc122\_HOM\_tm1a (Coronal)  
 Ccdc127\_HOM\_tm1b (Coronal)  
 Ccdc134\_HET\_tm1a (Coronal)  
 Ccdc137\_HET\_tm1a (Coronal)  
 Ccdc159\_HOM\_tm1a (Coronal)  
 Ccdc160\_HEML\_tm1a (Coronal)  
 Ccdc18\_HOM\_tm1a (Coronal)

1\_TBA  
 1\_LV  
 1\_Cg  
 1\_Cg\_Width  
 1\_Cg\_Height  
 1\_gcc  
 1\_gcc\_Width\_T  
 1\_gcc\_Width\_B  
 1\_gcc\_Height  
 1\_CPu  
 1\_aca  
 1\_Pir  
 1\_M1  
 1\_S2  
 2\_TBA  
 2\_LV  
 2\_D3V  
 2\_RSgc  
 2\_RSgc\_Width  
 2\_RSgc\_Height  
 2\_cc  
 2\_cc\_Width  
 2\_cc\_Height  
 2\_dhc  
 2\_AM  
 2\_Pir  
 2\_ic  
 2\_opt  
 2\_rlr  
 2\_lli  
 2\_Hb  
 2\_HP  
 2\_DG  
 2\_TLpy  
 2\_Mol  
 2\_Rad  
 2\_Rad  
 2\_Or  
 2\_M1  
 2\_S2  
 3\_TBA  
 3\_4V  
 3\_Pons  
 3\_Py  
 3\_g7  
 3\_CN  
 3\_Lat  
 3\_InA  
 3\_IgL

Increase  
 Decrease

■ [0;0.1[      ■ [0;0.1[  
 ■ [0.1;0.2[      ■ [0.1;0.2[  
 ■ [0.2;0.25[      ■ [0.2;0.25[  
 ■ [0.25;0.3[      ■ [0.25;0.3[  
 □ [0.3;+infinity[      □ [0.3;+infinity[

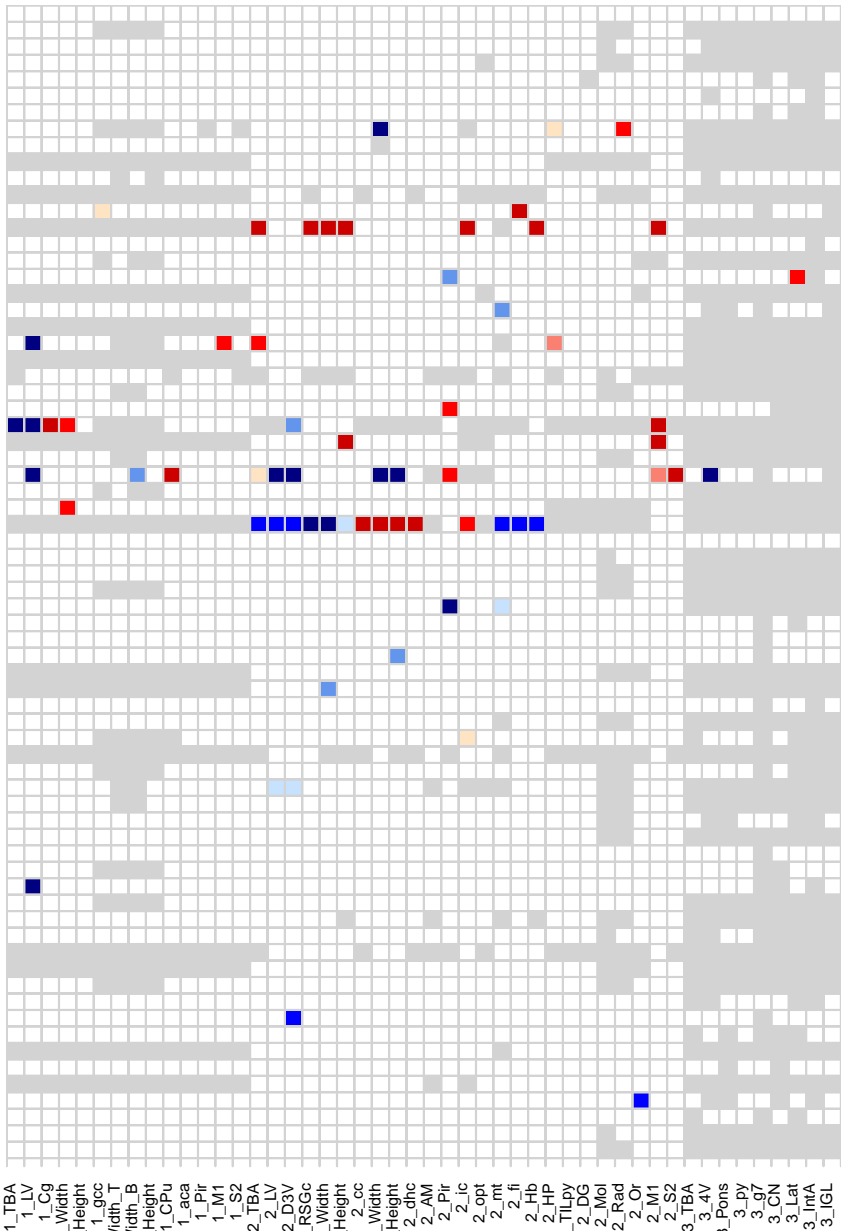

Ccdc24\_HOM\_tm1a (Coronal)  
 Ccdc6\_HET\_em1 (Coronal)  
 Ccdc69\_HOM\_tm1b (Coronal)  
 Ccdc77\_HOM\_tm1a (Coronal)  
 Ccl22\_HET\_tm1a (Coronal)  
 Cd300lg\_HOM\_tm1a (Coronal)  
 Cd55b\_HOM\_tm1a (Coronal)  
 Cdc6\_HET\_tm1a (Coronal)  
 Ccaca8\_HET\_tm1a (Coronal)  
 Cdh1\_HET\_tm1a (Coronal)  
 Cdh19\_HOM\_tm1a (Coronal)  
 Cdh23\_HOM/HET\_v (Coronal)  
 Cdk14\_HOM\_tm1a (Coronal)  
 Cdk5rap2\_HOM\_tm1a (Coronal)  
 Cdkal1\_HOM\_tm2a (Coronal)  
 Cdkn2a\_HOM\_tm1a (Coronal)  
 Cdkn2aipnl\_HOM\_tm1b (Coronal)  
 Cds2\_HET\_tm1a (Coronal)  
 Celf4\_HET\_tm1a (Coronal)  
 Cenpj\_HET\_tm1a (Coronal)  
 Cenpj\_HOM\_tm1a (Coronal)  
 Cenpj\_HOM\_tm1a (Coronal)  
 Cenpj\_HOM\_tm1a (Coronal)  
 Cenpl\_HET\_tm1b (Coronal)  
 Cep250\_HOM\_tm1a (Coronal)  
 Cep41\_HOM\_tm1a (Coronal)  
 Cfpap36\_HOM\_tm1a (Coronal)  
 Cfpap53\_HET\_em1 (Coronal)  
 Cfpap61\_HOM\_tm2a (Coronal)  
 Cfh\_HOM\_tm1a (Coronal)  
 Cgrrf1\_HOM\_tm1b (Coronal)  
 Chd7\_HET\_tm2a (Coronal)  
 Chd9\_HOM\_tm1a (Coronal)  
 Chia1\_HOM\_tm1a (Coronal)  
 Chil4\_HOM\_tm1b (Coronal)  
 Chka\_HET\_tm2a (Coronal)  
 Chmp6\_HET\_tm1b (Coronal)  
 Chst11\_HET\_tm1a (Coronal)  
 Chtop\_HET\_tm1a (Coronal)  
 Cirt\_HET\_tm3a (Coronal)  
 Cit\_HET\_tm1a (Coronal)  
 Cldn16\_HOM\_tm1a (Coronal)  
 Cldn34b2\_HEMI\_tm1a (Coronal)  
 Clk1\_HOM\_tm1a (Coronal)  
 Clpp\_HOM\_tm1a (Coronal)  
 Cluap1\_HET\_tm1a (Coronal)  
 Cluster5N1\_HOM\_tm1 (Coronal)  
 ClusterXN1\_HEMI\_tm1 (Coronal)  
 Cmb1\_HOM\_tm1b (Coronal)  
 Cmpip\_HET\_tm1a (Coronal)  
 Cmtn4\_HOM\_tm1a (Coronal)  
 Cmtn5\_HOM\_tm1a (Coronal)  
 Cmtn6\_HOM\_tm1a (Coronal)  
 Cnbd1\_HOM\_tm1b (Coronal)  
 Cnot4\_HET\_tm1b (Coronal)  
 Cnot6\_HOM\_tm1a (Coronal)  
 Cnot9\_HET\_tm1a (Coronal)  
 Cntrf\_HET\_tm1a (Coronal)  
 Cog2\_HET\_tm1a (Coronal)  
 Cog6\_HOM\_tm1a (Coronal)  
 Col24a1\_HOM\_tm1b (Coronal)  
 Col4a3bp\_HET\_tm1a (Coronal)  
 Commd10\_HET\_tm1a (Coronal)  
 Copg1\_HET\_tm1a (Coronal)  
 Coq4\_HET\_tm1a (Coronal)  
 Coq9\_HOM\_tm1a (Coronal)  
 Coro1c\_HET\_tm1a (Coronal)  
 Coro6\_HOM\_tm1e (Coronal)  
 Cox6a1\_HET\_tm1 (Coronal)  
 Cpgi81\_HOM\_tm1.1 (Coronal)

1\_TBA  
 1\_LV  
 1\_Cg  
 1\_Cg\_Width  
 1\_Cg\_Height  
 1\_gcc  
 1\_gcc\_Width\_T  
 1\_gcc\_Width\_B  
 1\_gcc\_Height  
 1\_CPu  
 1\_aca  
 1\_Pir  
 1\_M1  
 1\_S2  
 2\_TBA  
 2\_LV  
 2\_D3V  
 2\_RSgc  
 2\_RSgc\_Width  
 2\_RSgc\_Height  
 2\_cc  
 2\_cc\_Width  
 2\_dhc  
 2\_AM  
 2\_Pir  
 2\_ic  
 2\_opt  
 2\_rlr  
 2\_lli  
 2\_HP  
 2\_Hb  
 2\_TILpy  
 2\_DG  
 2\_Mol  
 2\_Rad  
 2\_Or  
 2\_M1  
 2\_S2  
 3\_TBA  
 3\_4V  
 3\_Pois  
 3\_py  
 3\_g7  
 3\_CN  
 3\_Lat  
 3\_IntA  
 3\_IgL

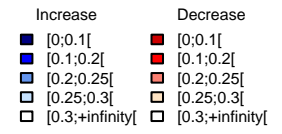

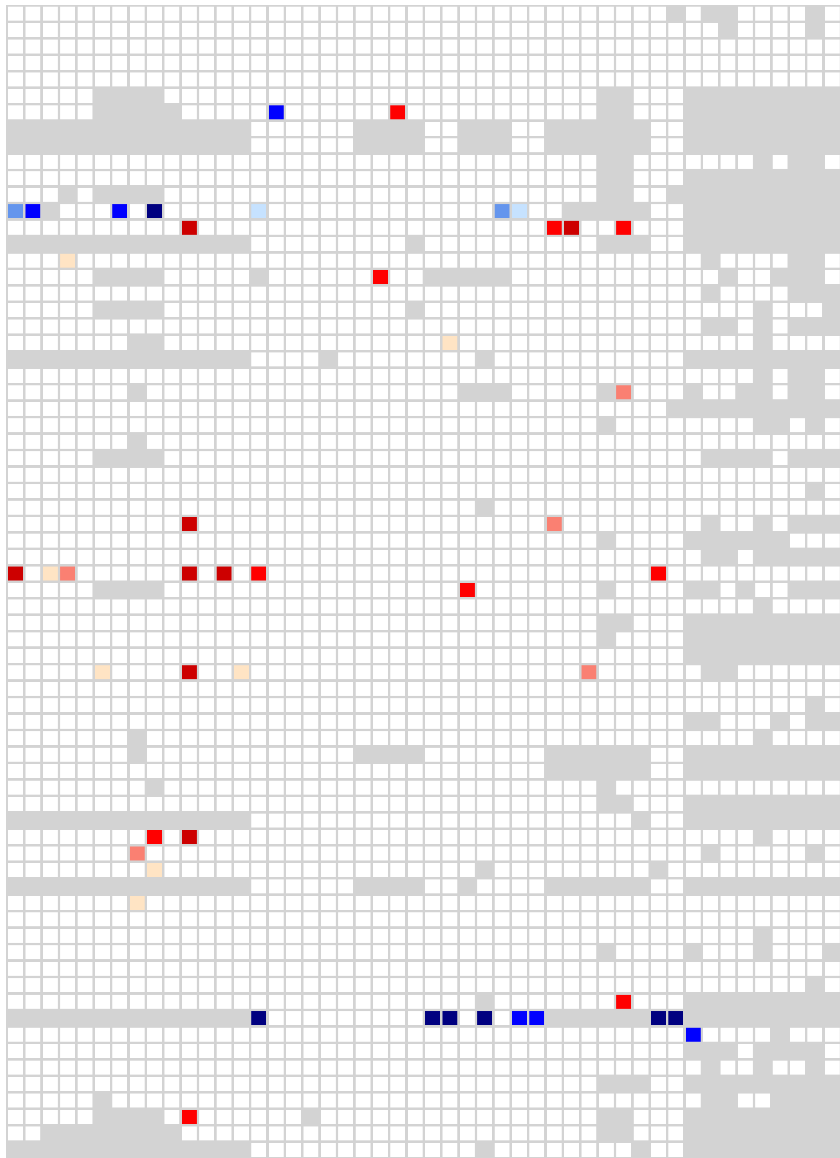

Cpsf3\_HET\_tm1a (Coronal)  
 Cpsf3\_HET\_tm1b (Coronal)  
 Cpt2\_HET\_tm1b (Coronal)  
 Crb2\_HET\_tm1a (Coronal)  
 Creb3l1\_HET\_tm1e (Coronal)  
 Criim1\_HET\_em1 (Coronal)  
 Criif3\_HOM\_em1 (Coronal)  
 Criif3\_HOM\_em1 (Coronal)  
 Criif3\_HOM\_em1 (Coronal)  
 Criif3\_HOM\_em1 (Coronal)  
 Crls1\_HET\_tm1a (Coronal)  
 Csmd1\_HOM\_em1 (Coronal)  
 Csnk1g3\_HOM\_tm1a (Coronal)  
 Ctcf\_HET\_tm1a (Coronal)  
 Ctnnal1\_HOM\_tm1e (Coronal)  
 Ctr9\_HET\_tm1b (Coronal)  
 Ctinbp2\_HOM\_tm1b (Coronal)  
 Cutal\_HOM\_tm1a (Coronal)  
 Cxcr1\_HOM\_tm1a (Coronal)  
 Cxcr2\_HET\_tm1a (Coronal)  
 Cxcr2\_HOM\_tm1a (Coronal)  
 Cyb561\_HOM\_tm1a (Coronal)  
 Cyba\_HOM\_tm1a (Coronal)  
 Cybc1\_HOM\_tm1a (Coronal)  
 Cyfiip1\_HET\_tm2a (Coronal)  
 Cyfiip2\_HET\_tm1a (Coronal)  
 Cyp20a1\_HOM\_tm1a (Coronal)  
 Cyp2b13\_HOM\_tm1b (Coronal)  
 Cyp2r1\_HOM\_tm1b (Coronal)  
 Cyp3a11\_HOM\_tm1a (Coronal)  
 D630023F18Rik\_HOM\_tm1b (Coronal)  
 D6Wsu163e\_HOM\_tm1b (Coronal)  
 D7Ert443e\_HOM\_tm2a (Coronal)  
 D930028M14Rik\_HET\_tm1a (Coronal)  
 Daam2\_HOM\_tm1a (Coronal)  
 Dact3\_HOM\_tm1b (Coronal)  
 Dap\_HOM\_tm1a (Coronal)  
 Dapk2\_HOM\_tm1b (Coronal)  
 Dars2\_HET\_tm1a (Coronal)  
 Dbn1\_HET\_tm1a (Coronal)  
 Dbn1\_HET\_tm1b (Coronal)  
 Dcaf11\_HOM\_tm1a (Coronal)  
 Dcbl2\_HOM\_tm1a (Coronal)  
 Dcdc2b\_HOM\_tm1b (Coronal)  
 Dcdc2c\_HOM\_tm1a (Coronal)  
 Dclk1\_HET\_tm1a (Coronal)  
 Dcn\_HOM\_em1 (Coronal)  
 Dctn1\_HET\_tm1a (Coronal)  
 Dctn1\_HET\_tm1a (Coronal)  
 Dctn4\_HET\_em1 (Coronal)  
 Dctn5\_HET\_tm2a (Coronal)  
 Dcx\_HEMI\_tm1a (Coronal)  
 Ddah1\_HOM\_tm2a (Coronal)  
 Ddhd1\_HOM\_tm1a (Coronal)  
 Ddx27\_HET\_tm1a (Coronal)  
 Ddx42\_HET\_tm1b (Coronal)  
 Ddx51\_HET\_tm1a (Coronal)  
 Ddx55\_HET\_tm1a (Coronal)  
 Def6\_HOM\_tm1a (Coronal)  
 Defb14\_HOM\_tm1b (Coronal)  
 Defb22\_HOM\_tm1a (Coronal)  
 Defb30\_HOM\_tm2b (Coronal)  
 Deluca\_HET\_Deluca (Coronal)  
 Dendd1b\_HOM\_tm1a (Coronal)  
 Dendd1c\_HOM\_tm1a (Coronal)  
 Dendd1c\_HOM\_tm1b (Coronal)  
 Dendd4c\_HET\_tm1b (Coronal)  
 Dendr\_HET\_tm1b (Coronal)  
 Dffb\_HOM\_em2 (Coronal)  
 Dfna5\_HOM\_tm1b (Coronal)  
 Dhcr24\_HET\_tm1a (Coronal)

1\_TBA  
 1\_LV  
 1\_Cg  
 1\_Cg\_Width  
 1\_Cg\_Height  
 1\_gcc  
 1\_gcc\_Width\_T  
 1\_gcc\_Width\_B  
 1\_gcc\_Height  
 1\_CPU  
 1\_aca  
 1\_Pir  
 1\_M1  
 1\_S2  
 2\_TBA  
 2\_LV  
 2\_D3V  
 2\_RSGC  
 2\_RSGC\_Width  
 2\_RSGC\_Height  
 2\_cc  
 2\_cc\_Width  
 2\_dhc  
 2\_Height  
 2\_AM  
 2\_Pir  
 2\_ic  
 2\_opt  
 2\_rlr  
 2\_rlr  
 2\_HB  
 2\_HP  
 2\_TLpy  
 2\_DG  
 2\_Mol  
 2\_Rad  
 2\_Or  
 2\_Or  
 2\_M1  
 2\_S2  
 3\_TBA  
 3\_4V  
 3\_Pois  
 3\_Py  
 3\_g7  
 3\_CN  
 3\_Lat  
 3\_InA  
 3\_IgL

Increase  
 Decrease

|                   |                   |
|-------------------|-------------------|
| ■ [0;0.1[         | ■ [0;0.1[         |
| ■ [0.1;0.2[       | ■ [0.1;0.2[       |
| ■ [0.2;0.25[      | ■ [0.2;0.25[      |
| ■ [0.25;0.3[      | ■ [0.25;0.3[      |
| □ [0.3;+infinity[ | □ [0.3;+infinity[ |

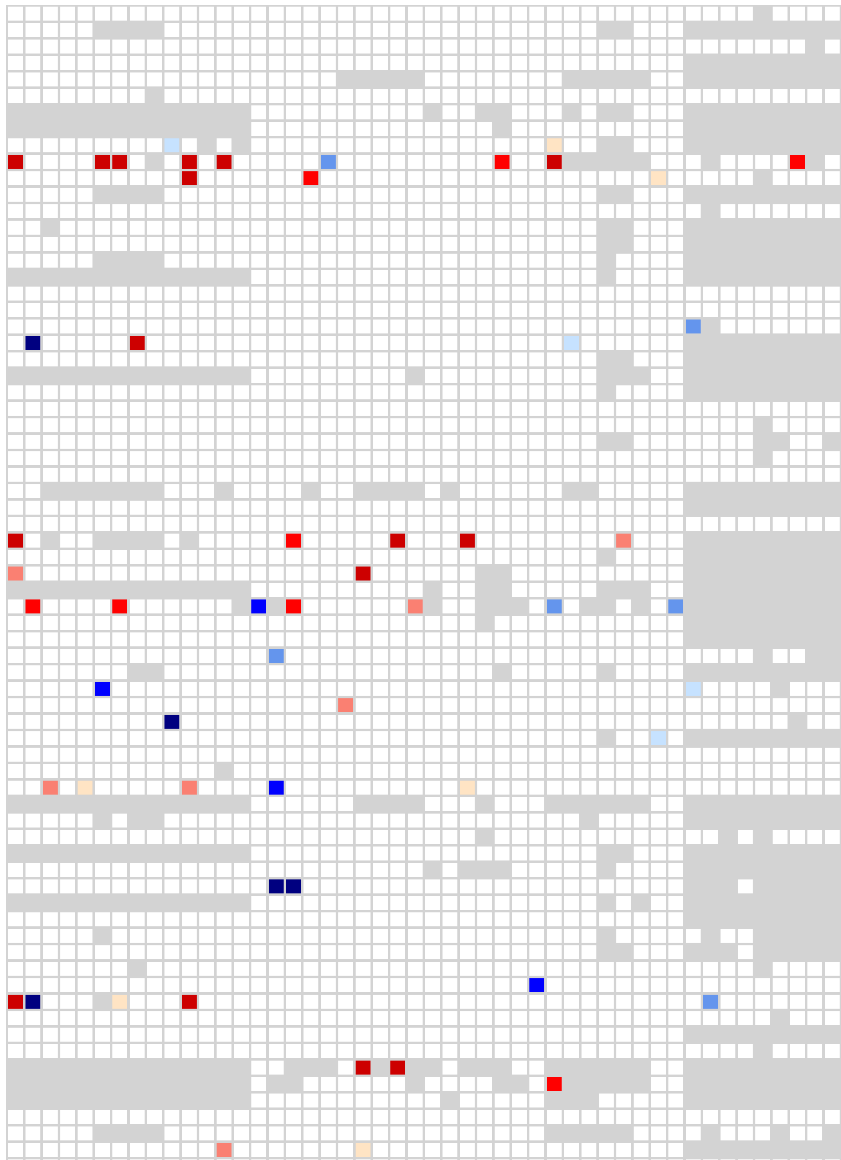

Dhodh\_HET\_tm1b (Coronal)  
 Dhps\_HET\_tm2a (Coronal)  
 Dhrrs2\_HOM\_tm1a (Coronal)  
 Dhx33\_HET\_tm1b (Coronal)  
 Dhx35\_HET\_tm1b (Coronal)  
 Dip2a\_HOM\_tm2b (Coronal)  
 Dip2b\_HET\_tm1a (Coronal)  
 Dlg2\_HOM\_tm1 (Coronal)  
 Dlg2\_HOM\_tm1a (Coronal)  
 Dlg3\_HEMI\_tm1a (Coronal)  
 Dlg4\_HOM\_tm1e (Coronal)  
 Dlk1\_HOM\_em1 (Coronal)  
 Dmghd\_HOM\_tm1a (Coronal)  
 Dmxi2\_HET\_tm1a (Coronal)  
 Dnah17\_HOM\_tm1e (Coronal)  
 Dnajc8\_HET\_tm1b (Coronal)  
 Dnase1l2\_HOM\_tm1.1 (Coronal)  
 Dnase1l2\_HOM\_tm1.1 (Coronal)  
 Dnmt3a\_HOM\_tm1a (Coronal)  
 Dnpep\_HOM\_tm1e (Coronal)  
 Donson\_HET\_tm1a (Coronal)  
 Dopey2\_HOM\_tm1a (Coronal)  
 Dot11\_HET\_tm1a (Coronal)  
 Dph2\_HET\_tm2 (Coronal)  
 Dph6\_HOM\_tm1a (Coronal)  
 Dpm1\_HET\_tm1b (Coronal)  
 Dppa1\_HOM\_tm1a (Coronal)  
 Dpy30\_HET\_tm1a (Coronal)  
 Dsc2\_HOM\_tm1e (Coronal)  
 Dscc1\_HET\_tm1a (Coronal)  
 Dscc1\_HOM\_tm1a (Coronal)  
 Dsg1b\_HOM\_tm1a (Coronal)  
 Duoxa2\_HOM\_tm1b (Coronal)  
 Dusp1\_HOM\_tm1 (Coronal)  
 Dusp26\_HOM\_tm1a (Coronal)  
 Dusp3\_HOM\_tm1a (Coronal)  
 Dusp3\_HOM\_tm1a (Coronal)  
 Dusp3\_HOM\_tm1b (Coronal)  
 Dusp4\_HOM\_tm1a (Coronal)  
 Dusp5\_HOM\_tm1a (Coronal)  
 Dync1i2\_HET\_tm1a (Coronal)  
 Dynll1\_HET\_tm1 (Coronal)  
 Dynlrb1\_HET\_tm1a (Coronal)  
 Dynlrb2\_HET\_tm1a (Coronal)  
 Ears2\_HET\_tm1a (Coronal)  
 Eci3\_HOM\_tm1b (Coronal)  
 Edc4\_HET\_tm1a (Coronal)  
 Eef1akmt1\_HOM\_tm1a (Coronal)  
 Efn1\_HOM\_tm1a (Coronal)  
 Egr\_HET\_tm1a (Coronal)  
 Ehbp1l1\_HET\_tm1a (Coronal)  
 Ehd1\_HET\_tm1a (Coronal)  
 Eif2b2\_HET\_tm2a (Coronal)  
 Eif3h\_HET\_tm1a (Coronal)  
 Eif4e3\_HOM\_tm1a (Coronal)  
 Elac2\_HET\_tm1b (Coronal)  
 Elk4\_HOM\_tm1a (Coronal)  
 Eli2\_HOM\_tm1a (Coronal)  
 Eli2\_HOM\_tm1b (Coronal)  
 Elmo1\_HOM\_tm1a (Coronal)  
 Enc1\_HOM\_tm1a (Coronal)  
 Endou\_HOM\_tm1 (Coronal)  
 Entpd1\_HOM\_tm1a (Coronal)  
 Entpd6\_HOM\_tm1a (Coronal)  
 Epc1\_HET\_tm1e (Coronal)  
 Epc2\_HET\_tm1e (Coronal)  
 Eps15\_HOM\_tm1a (Coronal)  
 Erlin2\_HOM\_tm1a (Coronal)  
 Erp44\_HET\_tm1a (Coronal)  
 Escoc1\_HOM\_tm1 (Coronal)

1\_TBA  
 1\_LV  
 1\_Cg  
 1\_Cg\_Width  
 1\_Cg\_Height  
 1\_gcc  
 1\_gcc\_Width\_T  
 1\_gcc\_Width\_B  
 1\_gcc\_Height  
 1\_CPu  
 1\_aca  
 1\_Pir  
 1\_M1  
 1\_S2  
 2\_TBA  
 2\_LV  
 2\_DAV  
 2\_RSgc  
 2\_RSgc\_Width  
 2\_RSgc\_Height  
 2\_cc  
 2\_cc\_Width  
 2\_dhc  
 2\_Height  
 2\_AM  
 2\_Pir  
 2\_Ic  
 2\_ic  
 2\_opt  
 2\_rlr  
 2\_lli  
 2\_Hb  
 2\_HP  
 2\_TLpy  
 2\_DG  
 2\_Mol  
 2\_Rad  
 2\_Rad  
 2\_Or  
 2\_M1  
 2\_S2  
 3\_TBA  
 3\_4V  
 3\_Pois  
 3\_Py  
 3\_g7  
 3\_CN  
 3\_Lat  
 3\_IntA  
 3\_IgL

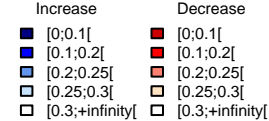

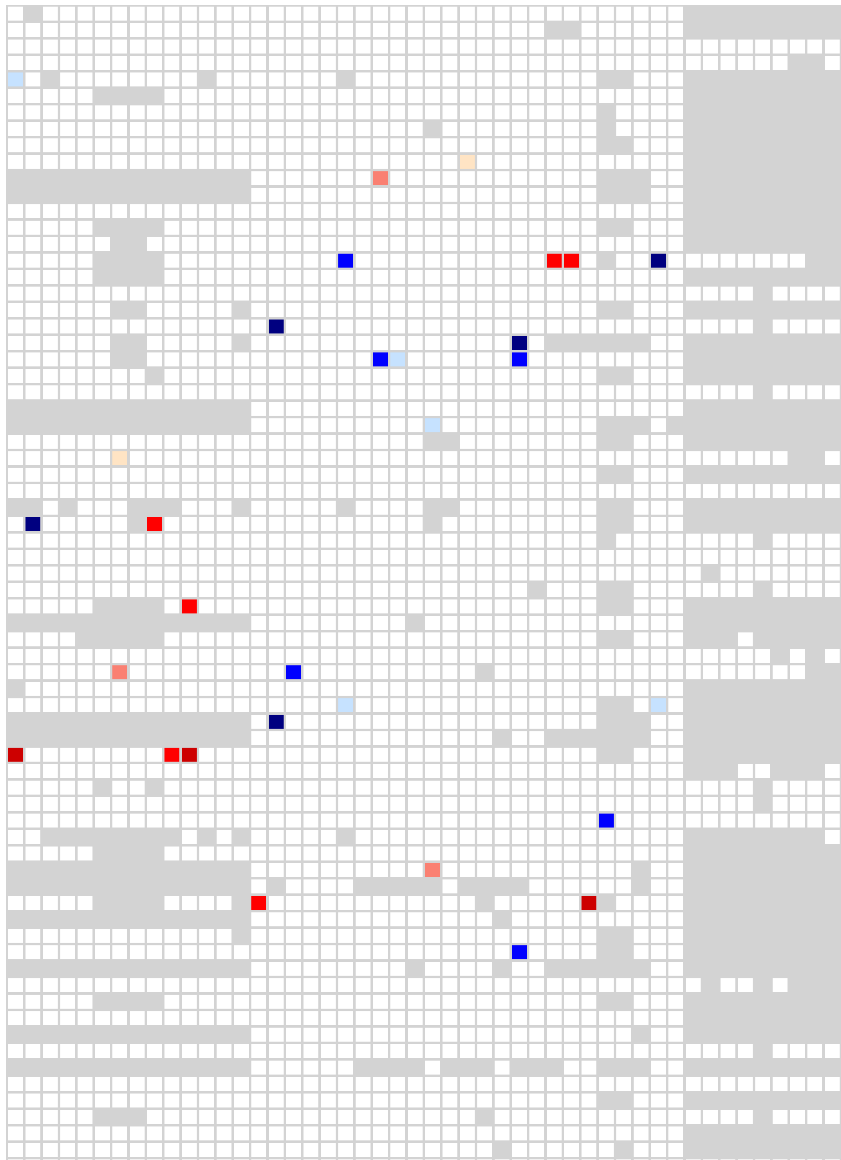

Esco2\_HET\_tm1a (Coronal)  
 Espn\_HOM\_tm1a (Coronal)  
 Evi5\_HOM\_tm1a (Coronal)  
 Exoc3l2\_HET\_tm1b (Coronal)  
 Exoc3l2\_HOM\_tm1a (Coronal)  
 Exosc9\_HET\_tm1b (Coronal)  
 Ezh2\_HET\_tm1a (Coronal)  
 Ezh2\_HOM\_tm1a (Coronal)  
 Ezr\_HET\_tm2a (Coronal)  
 Fads3\_HOM\_tm1b (Coronal)  
 Fahd2a\_HOM\_tm1a (Coronal)  
 Fam104a\_HOM\_tm2a (Coronal)  
 Fam107b\_HOM\_tm1a (Coronal)  
 Fam122c\_HEMI\_tm1b (Coronal)  
 Fam160a1\_HET\_tm1b (Coronal)  
 Fam163a\_HOM\_tm2b (Coronal)  
 Fam175b\_HOM\_tm1a (Coronal)  
 Fam212b\_HOM\_tm1a (Coronal)  
 Fam46c\_HET\_tm1b (Coronal)  
 Fam47e\_HOM\_tm1a (Coronal)  
 Fam69a\_HOM\_tm1a (Coronal)  
 Fam71b\_HOM\_tm1a (Coronal)  
 Fam92a\_HOM\_tm1b (Coronal)  
 Fam96a\_HOM\_tm2a (Coronal)  
 Fanci\_HET\_tm1a (Coronal)  
 Farp2\_HOM\_tm1a (Coronal)  
 Farp2\_HOM\_tm1a (Coronal)  
 Farsa\_HET\_tm2a (Coronal)  
 Fb1\_HOM\_tm1a (Coronal)  
 Fbx17\_HOM\_tm1a (Coronal)  
 Fbxo33\_HOM\_tm1b (Coronal)  
 Fbxo47\_HET\_tm1a (Coronal)  
 Fbxo47\_HOM\_tm1a (Coronal)  
 Fbxo7\_HOM\_tm1a (Coronal)  
 Fbxw26\_HOM\_tm1b (Coronal)  
 Fdft1\_HET\_tm1a (Coronal)  
 Fggy\_HOM\_tm1a (Coronal)  
 Fkbp3\_HOM\_tm2a (Coronal)  
 Fkbp7\_HOM\_tm2a (Coronal)  
 Fnip2\_HOM\_tm1a (Coronal)  
 Frmd7\_HEMI\_tm1a (Coronal)  
 Frs1\_HET\_tm1a (Coronal)  
 Fryl\_HET\_tm1a (Coronal)  
 Fryl\_HET\_tm1b (Coronal)  
 Fto\_HOM\_tm1a (Coronal)  
 Fundc1\_HEMI\_tm1a (Coronal)  
 Fundc1\_HEMI\_tm1c (Coronal)  
 Fxyd3\_HOM\_tm1a (Coronal)  
 Fyn\_HET\_tm1a (Coronal)  
 Fzd6\_HOM\_tm2a (Coronal)  
 G3bp2\_HET\_tm1a (Coronal)  
 Galnt18\_HOM\_tm1b (Coronal)  
 Galntl5\_HOM\_tm1b (Coronal)  
 Gap43\_HET\_tm1a (Coronal)  
 Gatac\_HET\_tm1a (Coronal)  
 Gba2\_HOM\_tm1a (Coronal)  
 Gbe1\_HET\_tm1a (Coronal)  
 Gbf1\_HET\_tm1a (Coronal)  
 Gbp5\_HOM\_em1 (Coronal)  
 Gclc\_HOM\_tm1a (Coronal)  
 Gda\_HOM\_tm1a (Coronal)  
 Gdpc2\_HEMI\_tm1a (Coronal)  
 Gfm1\_HET\_tm1a (Coronal)  
 Gif\_HOM\_tm1a (Coronal)  
 Gimap6\_HOM\_tm1a (Coronal)  
 Git2\_HOM\_Gt (Coronal)  
 Glcd\_HET\_tm1a (Coronal)  
 Gle1\_HET\_tm1a (Coronal)  
 Glg1\_HET\_tm1a (Coronal)  
 Glo1\_HOM\_tm1a (Coronal)  
 Glt8d2\_HET\_tm1a (Coronal)

1\_TBA  
 1\_LV  
 1\_Cg  
 1\_Cg\_Width  
 1\_Cg\_Height  
 1\_gcc  
 1\_gcc\_Width\_T  
 1\_gcc\_Width\_B  
 1\_gcc\_Height  
 1\_CPU  
 1\_aca  
 1\_Pir  
 1\_M1  
 1\_S2  
 2\_TBA  
 2\_LV  
 2\_DAV  
 2\_RSgc  
 2\_RSgc\_Width  
 2\_RSgc\_Height  
 2\_cc  
 2\_cc\_Width  
 2\_dhc  
 2\_AM  
 2\_Pir  
 2\_Ic  
 2\_opt  
 2\_rtr  
 2\_lli  
 2\_HP  
 2\_HB  
 2\_HP  
 2\_Tlly  
 2\_DG  
 2\_Mol  
 2\_Rad  
 2\_Or  
 2\_M1  
 2\_S2  
 3\_TBA  
 3\_4V  
 3\_Pois  
 3\_py  
 3\_g7  
 3\_CN  
 3\_Lat  
 3\_IntA  
 3\_Igl

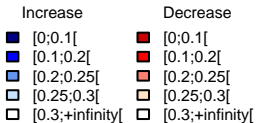

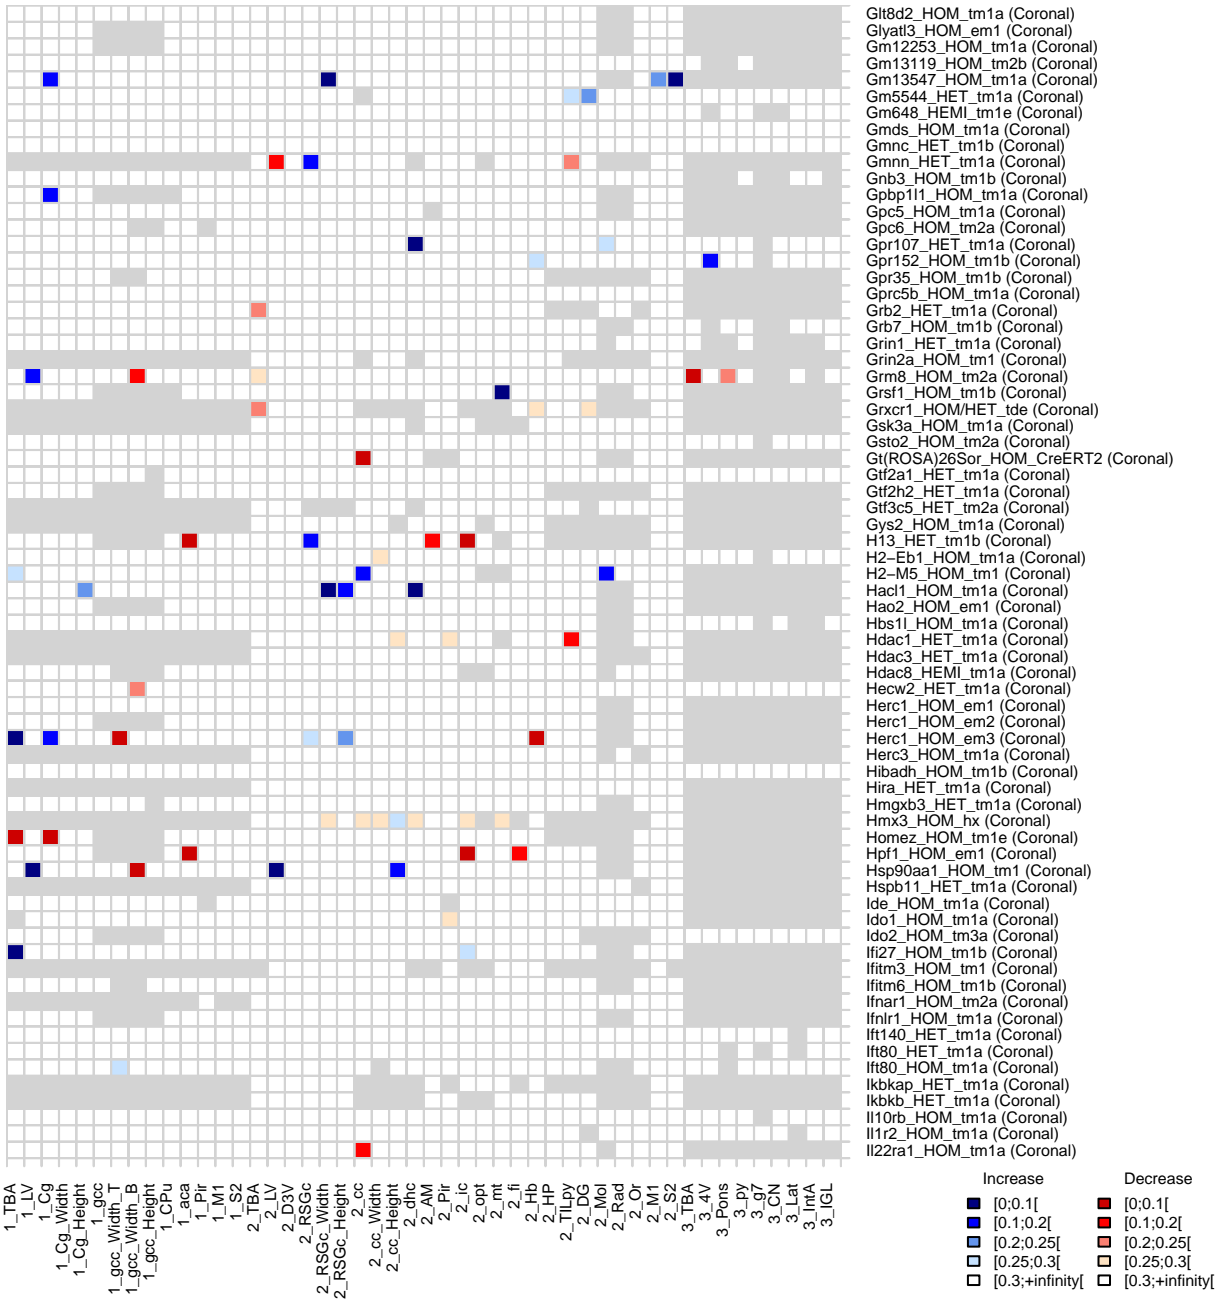



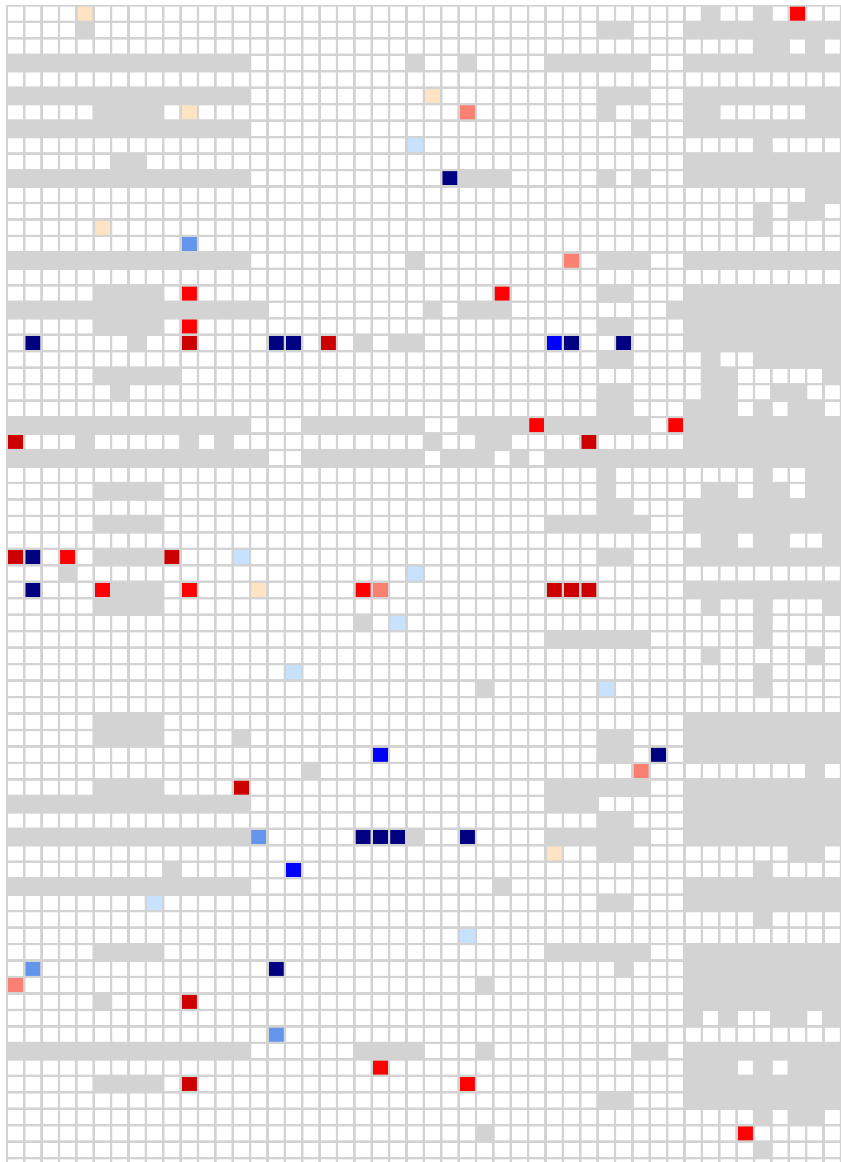

IL23r\_HOM\_tm2a (Coronal)  
 IL27\_HOM\_tm1b (Coronal)  
 Ildr1\_HOM\_tm1 (Coronal)  
 Impad1\_HET\_tm1a (Coronal)  
 Inava\_HOM\_tm2a (Coronal)  
 Inpp1\_HOM\_tm1a (Coronal)  
 Inpp1\_HOM\_tm1b (Coronal)  
 Ints12\_HET\_tm1a (Coronal)  
 Ints2\_HET\_tm1a (Coronal)  
 Irak1\_HEMI\_tm1b (Coronal)  
 Irf1\_HOM\_tm1a (Coronal)  
 Irf5\_HOM\_tm1e (Coronal)  
 Irf7\_HOM\_tm1 (Coronal)  
 Isg20\_HOM\_tm1a (Coronal)  
 Izumo1r\_HOM\_tm2a (Coronal)  
 Jarid2\_HET\_tm1a (Coronal)  
 Jmjd1c\_HET\_tm1a (Coronal)  
 Jostd1\_HOM\_em1 (Coronal)  
 Kat14\_HOM\_tm1a (Coronal)  
 Kat2b\_HOM\_em1 (Coronal)  
 Kazn\_HOM\_tm1a (Coronal)  
 Kcne2\_HOM\_tm1a (Coronal)  
 Kcnh4\_HOM\_tm1b (Coronal)  
 Kcnip4\_HOM\_tm1a (Coronal)  
 Kcnv2\_HOM\_tm1 (Coronal)  
 Kctd10\_HET\_Gt (Coronal)  
 Kdm4b\_HET\_tm1a (Coronal)  
 Kdm4c\_HOM\_tm1a (Coronal)  
 Kdm4d\_HOM\_tm2a (Coronal)  
 Kdm7a\_HOM\_tm1a (Coronal)  
 Kdm8\_HET\_tm1a (Coronal)  
 Kera\_HOM\_em1 (Coronal)  
 Kif13b\_HOM\_tm1b (Coronal)  
 Kif18b\_HET\_tm1a (Coronal)  
 Kif1bp\_HET\_tm1a (Coronal)  
 Kif21b\_HOM\_tm1a (Coronal)  
 Kif24\_HOM\_tm1b (Coronal)  
 Kif3b\_HET\_tm1b (Coronal)  
 Kifap3\_HET\_tm1a (Coronal)  
 Klic2\_HOM\_tm1e (Coronal)  
 Kif17\_HOM\_tm1b (Coronal)  
 Kihl18\_HOM\_tm1a (Coronal)  
 Kihl21\_HET\_tm1a (Coronal)  
 Kihl30\_HOM\_tm1a (Coronal)  
 Kik5\_HOM\_tm2a (Coronal)  
 Kik6\_HOM\_em1 (Coronal)  
 Kik9\_HOM\_tm1a (Coronal)  
 Klrb1a\_HOM\_tm1a (Coronal)  
 Kmt5b\_HET\_tm1a (Coronal)  
 Kng2\_HOM\_tm2a (Coronal)  
 Kptn\_HOM\_tm1a (Coronal)  
 Krt31\_HOM\_tm1e (Coronal)  
 Krt7\_HOM\_tm1b (Coronal)  
 Krt76\_HET\_tm1a (Coronal)  
 Krt83\_HOM\_tm1b (Coronal)  
 Krt88\_HOM\_tm1a (Coronal)  
 L3mbtl2\_HET\_tm2a (Coronal)  
 Lacc1\_HOM\_tm1a (Coronal)  
 Lamc3\_HOM\_tm1a (Coronal)  
 Laptm5\_HOM\_tm1a (Coronal)  
 Lars\_HET\_tm1b (Coronal)  
 Lce1m\_HOM\_tm1b (Coronal)  
 Lce3c\_HOM\_tm2a (Coronal)  
 Ldha\_HET\_tm1a (Coronal)  
 Ldhb\_HOM\_tm1b (Coronal)  
 Ldlrad4\_HOM\_tm1b (Coronal)  
 Leo1\_HET\_tm1a (Coronal)  
 Leprot\_HOM\_tm2a (Coronal)  
 Leprot\_HOM\_tm2b (Coronal)  
 Lgals7\_HOM\_tm1a (Coronal)

1\_TBA  
 1\_LV  
 1\_Cg  
 1\_Cg\_Width  
 1\_Cg\_Height  
 1\_gcc  
 1\_gcc\_Width\_B  
 1\_gcc\_Width  
 1\_gcc\_Height  
 1\_CPU  
 1\_aca  
 1\_Pir  
 1\_M1  
 1\_S2  
 2\_TBA  
 2\_LV  
 2\_DAV  
 2\_RSGC  
 2\_RSGC\_Width  
 2\_RSGC\_Height  
 2\_cc  
 2\_cc\_Width  
 2\_dhc  
 2\_AM  
 2\_Pir  
 2\_Ic  
 2\_opt  
 2\_rlr  
 2\_lli  
 2\_HB  
 2\_HP  
 2\_TLpy  
 2\_DG  
 2\_Mol  
 2\_Rad  
 2\_Or  
 2\_M1  
 2\_S2  
 3\_TBA  
 3\_4V  
 3\_Pois  
 3\_py  
 3\_g7  
 3\_CN  
 3\_Lat  
 3\_IntA  
 3\_IgL

Increase

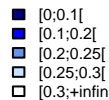

Decrease

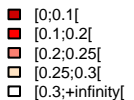

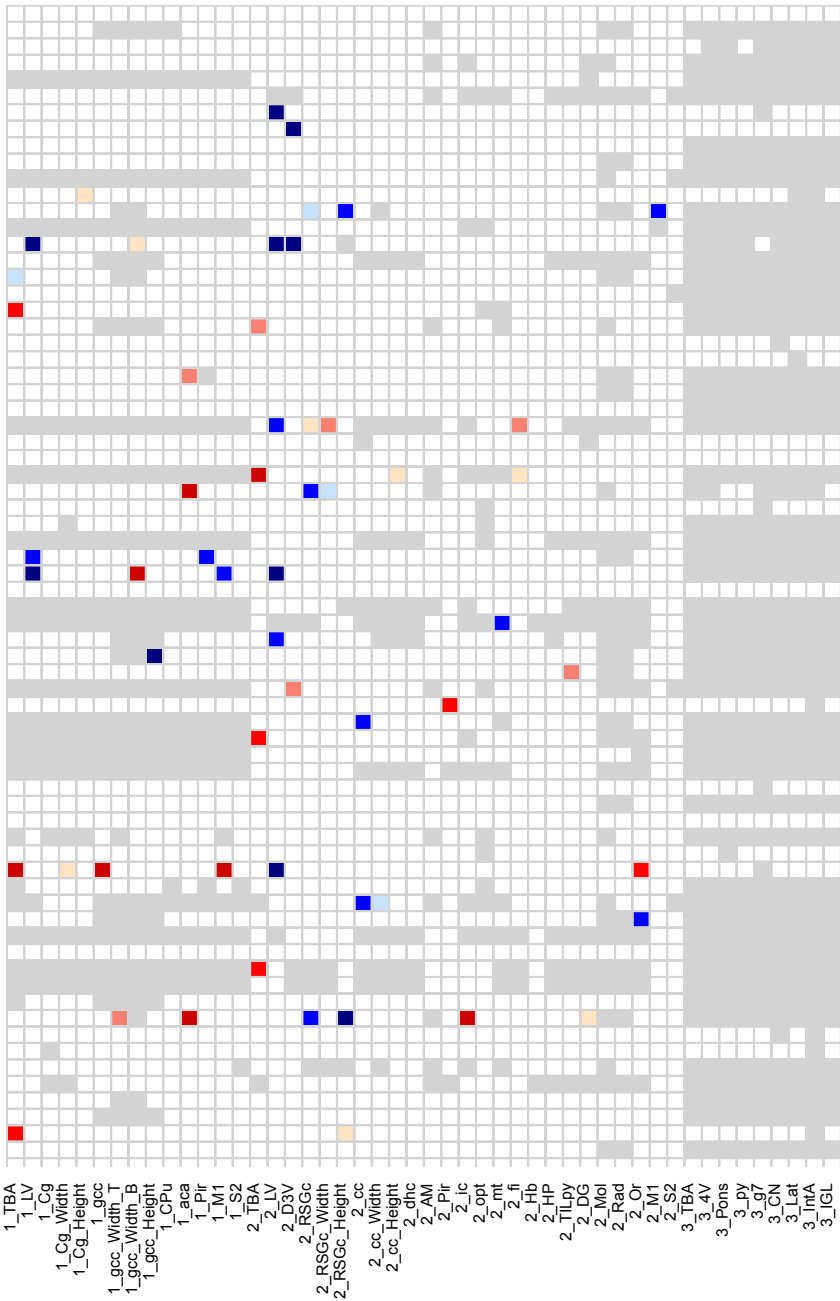

Lgals7\_HOM\_tm1b (Coronal)  
 Lix11\_HET\_tm1a (Coronal)  
 Lmna\_HET\_G609G (Coronal)  
 Lmnb1\_HET\_tm1a (Coronal)  
 Lmnb2\_HET\_tm1a (Coronal)  
 Lnx2\_HOM\_tm1a (Coronal)  
 Lonrf3\_HEMI\_tm1a (Coronal)  
 Lonrf3\_HEMI\_tm1b (Coronal)  
 Lpar5\_HOM\_tm1a (Coronal)  
 Lpxn\_HOM\_tm1b (Coronal)  
 Lrig1\_HOM\_tm1a (Coronal)  
 Lrmda\_HOM\_tm1e (Coronal)  
 Lrmp\_HOM\_tm1b (Coronal)  
 Lrrprc\_HET\_tm1a (Coronal)  
 Lrrc23\_HOM\_tm1a (Coronal)  
 Lrrc71\_HOM\_tm1a (Coronal)  
 Lrrc8d\_HOM\_tm1a (Coronal)  
 Lsm10\_HET\_tm2a (Coronal)  
 Lsm11\_HET\_tm1a (Coronal)  
 Ltbp1\_HOM\_tm1a (Coronal)  
 Lyplal1\_HOM\_tm1a (Coronal)  
 Lyrm9\_HOM\_tm1a (Coronal)  
 Lztr1\_HET\_tm1a (Coronal)  
 Macrod1\_HOM\_em2 (Coronal)  
 Mad2l2\_HET\_tm1a (Coronal)  
 Magi2\_HET\_tm1 (Coronal)  
 Mamstr\_HOM\_tm1b (Coronal)  
 Man2b2\_HOM\_tm1b (Coronal)  
 Maneal\_HOM\_tm1a (Coronal)  
 Map2k2\_HOM\_tm1a (Coronal)  
 Map2k7\_HET\_tm1a (Coronal)  
 Map3k1\_HET\_tm1a (Coronal)  
 Mapk1\_HET\_tm1a (Coronal)  
 Mapk10\_HOM\_tm1a (Coronal)  
 March5\_HET\_tm1a (Coronal)  
 Mast2\_HOM\_tm1a (Coronal)  
 Matn1\_HOM\_tm1 (Coronal)  
 Matn3\_HOM\_tm1 (Coronal)  
 Mau2\_HET\_tm1b (Coronal)  
 Mbd1\_HOM\_em1 (Coronal)  
 Mbi2\_HOM\_em1 (Coronal)  
 Mbt2\_HET\_tm2a (Coronal)  
 Mcf2l\_HOM\_tm1a (Coronal)  
 Mcph1\_HOM\_tm1a (Coronal)  
 Mcph1\_HOM\_tm1a (Coronal)  
 Mdn1\_HET\_tm1a (Coronal)  
 Mecr\_HET\_tm1a (Coronal)  
 Med22\_HET\_tm1a (Coronal)  
 Med23\_HET\_em1 (Coronal)  
 Medag\_HOM\_tm2b (Coronal)  
 Melk\_HOM\_tm1a (Coronal)  
 Metrn1\_HOM\_tm1b (Coronal)  
 Mettl24\_HOM\_tm1a (Coronal)  
 Mfrp\_HOM\_tm2a (Coronal)  
 Mfsd2b\_HOM\_tm1a (Coronal)  
 Mgat4c\_HOM\_tm1a (Coronal)  
 Mgst3\_HOM\_tm1a (Coronal)  
 Mgst3\_HOM\_tm1b (Coronal)  
 Miga2\_HOM\_tm1a (Coronal)  
 Miga2\_HOM\_tm1a (Coronal)  
 Mindy1\_HOM\_tm1a (Coronal)  
 mir122\_HOM\_tm1 (Coronal)  
 mir145\_HET\_no gene (Coronal)  
 mir145\_HOM\_no gene (Coronal)  
 mir146a\_HET\_no gene (Coronal)  
 mir146a\_HOM\_no gene (Coronal)  
 mir32\_HOM\_tm1 (Coronal)  
 mir96\_HOM\_tm2.2 (Coronal)  
 mir145-mir146a\_HET\_no gene (Coronal)  
 mir183-mir96\_HOM\_tm1 (Coronal)

1\_TBA  
 1\_LV  
 1\_Cg  
 1\_Cg\_Width  
 1\_Cg\_Height  
 1\_gcc  
 1\_gcc\_Width\_I  
 1\_gcc\_Width\_B  
 1\_gcc\_Height  
 1\_CPu  
 1\_Pir  
 1\_Pir  
 1\_M1  
 1\_S2  
 2\_TBA  
 2\_LV  
 2\_D3V  
 2\_RSgc  
 2\_RSgc\_Width  
 2\_RSgc\_Height  
 2\_cc  
 2\_cc\_Width  
 2\_cc\_Height  
 2\_dhc  
 2\_AM  
 2\_Pir  
 2\_Ic  
 2\_opt  
 2\_rlr  
 2\_zll  
 2\_Hb  
 2\_HP  
 2\_TILpy  
 2\_DG  
 2\_Mol  
 2\_Rad  
 2\_Rad  
 2\_Or  
 2\_M1  
 2\_S2  
 3\_TBA  
 3\_4V  
 3\_Pois  
 3\_Py  
 3\_g7  
 3\_CN  
 3\_Lat  
 3\_IntA  
 3\_IGL

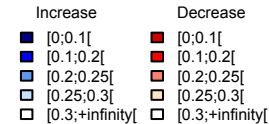

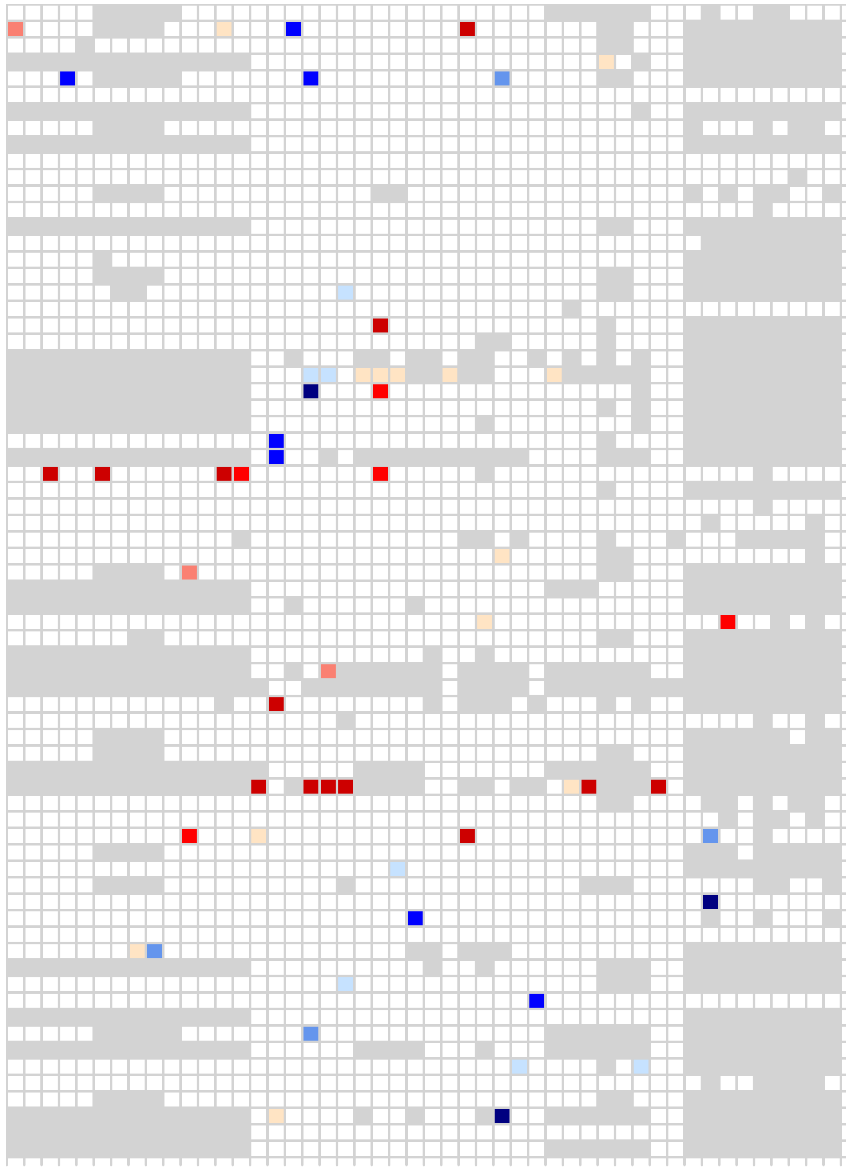

mir210\_HOM\_tm1 (Coronal)  
 mir211\_HOM\_tm1 (Coronal)  
 mir342\_HOM\_tm1 (Coronal)  
 Mis18bp1\_HET\_tm1a (Coronal)  
 Mkrn2\_HOM\_em1 (Coronal)  
 Mkrn2\_HOM\_em1 (Coronal)  
 Mks1\_HET\_tm1a (Coronal)  
 Mlec\_HOM\_tm1a (Coronal)  
 Mms22l\_HET\_tm1a (Coronal)  
 Mospd1\_HEMI\_tm1a (Coronal)  
 Mpg\_HOM\_tm1a (Coronal)  
 Mrap2\_HOM\_tm1a (Coronal)  
 Mrm1\_HOM\_tm2a (Coronal)  
 Mrnip\_HOM\_tm1a (Coronal)  
 Mroh4\_HOM\_tm1b (Coronal)  
 Mroh7\_HOM\_tm1a (Coronal)  
 Mroh9\_HOM\_tm1a (Coronal)  
 Mrps21\_HET\_tm1e (Coronal)  
 Mrps5\_HET\_tm1b (Coronal)  
 Msmo1\_HET\_tm1a (Coronal)  
 Mst1\_HOM\_tm1 (Coronal)  
 Mta1\_HOM\_tm1a (Coronal)  
 Mta1\_HOM\_tm1a (Coronal)  
 Mta3\_HOM\_tm3a (Coronal)  
 Mtfmt\_HET\_tm1e (Coronal)  
 Mthfd1l\_HET\_tm1a (Coronal)  
 Mtor\_HET\_tm1a (Coronal)  
 Mtrf1l\_HET\_tm1a (Coronal)  
 Mtss1l\_HOM\_tm1a (Coronal)  
 Mx1\_HOM\_tm1a (Coronal)  
 Mybphl\_HET\_tm1b (Coronal)  
 Mybphl\_HOM\_tm1a (Coronal)  
 Myd88\_HOM\_tm1a (Coronal)  
 Myh14\_HOM\_tm1a (Coronal)  
 Myh7b\_HOM\_tm1a (Coronal)  
 Myh9\_HET\_tm1a (Coronal)  
 Myl12b\_HOM\_tm1a (Coronal)  
 Myo10\_HOM\_tm2 (Coronal)  
 Myo15\_HOM\_tm1a (Coronal)  
 Myo5a\_HOM\_tm1a (Coronal)  
 Myo6\_HET\_sv (Coronal)  
 Myo6\_HOM\_sv (Coronal)  
 Myo7a\_HOM/HET\_sh1-6J (Coronal)  
 Myo7a\_HOM\_tm1a (Coronal)  
 Myo9a\_HET\_tm1b (Coronal)  
 Myrfl\_HOM\_tm1a (Coronal)  
 Mysm1\_HET\_tm1a (Coronal)  
 Mysm1\_HOM\_tm1a (Coronal)  
 Myt1l\_HOM\_tm1a (Coronal)  
 Naaa\_HOM\_tm1a (Coronal)  
 Nacad\_HOM\_tm1 (Coronal)  
 Nacc2\_HOM\_tm2b (Coronal)  
 Nadk2\_HET\_tm1b (Coronal)  
 Naga\_HOM\_tm1a (Coronal)  
 Nat10\_HET\_tm1a (Coronal)  
 Natd1\_HOM\_tm1b (Coronal)  
 Nbeal2\_HOM\_tm1a (Coronal)  
 Ncaph\_HET\_tm1a (Coronal)  
 Ncaph2\_HET\_tm1a (Coronal)  
 Ncf2\_HOM\_tm1a (Coronal)  
 Ndufb8\_HET\_tm1a (Coronal)  
 Ndufs3\_HET\_tm1a (Coronal)  
 Neb1\_HOM\_tm1b (Coronal)  
 Necab2\_HOM\_tm1a (Coronal)  
 Nek3\_HOM\_tm1b (Coronal)  
 Nek9\_HET\_tm1a (Coronal)  
 Nelfe\_HET\_tm1a (Coronal)  
 Nf1\_HET\_tm1a (Coronal)  
 Nfk5l\_HOM\_tm1a (Coronal)  
 Nfk1b\_HOM\_tm1a (Coronal)

1\_TBA  
 1\_LV  
 1\_Cg  
 1\_Cg\_Width  
 1\_Cg\_Height  
 1\_gcc  
 1\_gcc\_Width\_T  
 1\_gcc\_Width\_B  
 1\_gcc\_Height  
 1\_CPU  
 1\_Pir  
 1\_aca  
 1\_M1  
 1\_S2  
 2\_TBA  
 2\_LV  
 2\_DAV  
 2\_RSgc  
 2\_RSgc\_Width  
 2\_RSgc\_Height  
 2\_cc  
 2\_cc\_Width  
 2\_dhc  
 2\_AM  
 2\_Pir  
 2\_ic  
 2\_opt  
 2\_rlr  
 2\_lli  
 2\_Hb  
 2\_HP  
 2\_TILpy  
 2\_DG  
 2\_Mol  
 2\_Rad  
 2\_Or  
 2\_M1  
 2\_S2  
 2\_S2  
 3\_TBA  
 3\_4V  
 3\_Pois  
 3\_py  
 3\_g7  
 3\_CN  
 3\_Lat  
 3\_InA  
 3\_IGL

Increase  
 Decrease

|                   |                   |
|-------------------|-------------------|
| ■ [0;0.1[         | ■ [0;0.1[         |
| ■ [0.1;0.2[       | ■ [0.1;0.2[       |
| ■ [0.2;0.25[      | ■ [0.2;0.25[      |
| ■ [0.25;0.3[      | ■ [0.25;0.3[      |
| □ [0.3;+infinity[ | □ [0.3;+infinity[ |

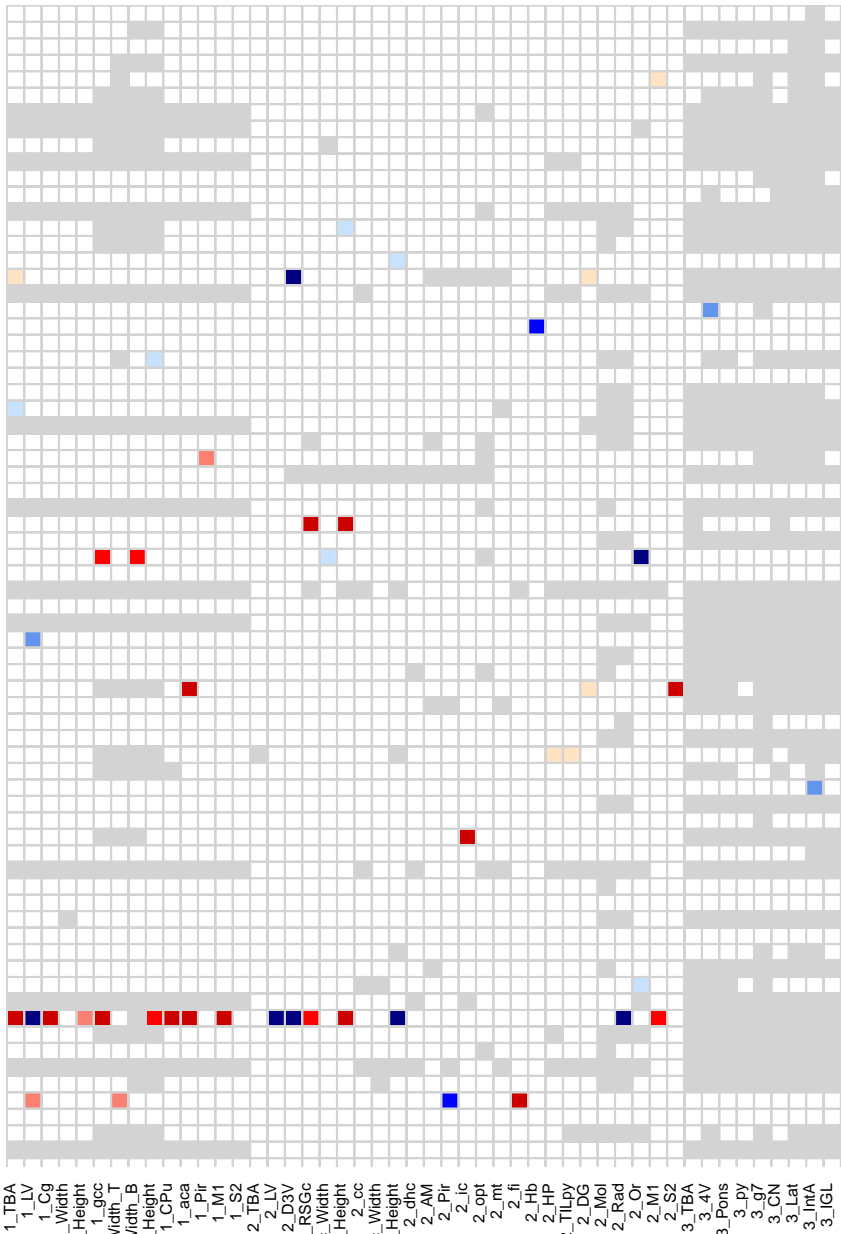

Nfkbi1\_HOM\_tm1a (Coronal)  
 Nfya\_HET\_Gt (Coronal)  
 Ngrn\_HET\_tm1a (Coronal)  
 Nhirc2\_HET\_tm1a (Coronal)  
 Nhp2\_HET\_tm1a (Coronal)  
 Ninj2\_HOM\_tm1a (Coronal)  
 Nini\_HOM\_tm1a (Coronal)  
 Nipa1\_HOM\_tm1a (Coronal)  
 Nipsnap3a\_HOM\_tm1b (Coronal)  
 NKiras2\_HOM\_tm1a (Coronal)  
 Nme4\_HOM\_tm1a (Coronal)  
 Nmrk1\_HOM\_tm1a (Coronal)  
 Nom1\_HET\_tm1a (Coronal)  
 Npat\_HET\_tm1b (Coronal)  
 Nrpb1\_HET\_tm3b (Coronal)  
 Nrde2\_HET\_tm2a (Coronal)  
 Nsmf\_HOM\_tm1a (Coronal)  
 Nsun2\_HET\_tm1a (Coronal)  
 Nubpl\_HET\_tm1b (Coronal)  
 Nudt12\_HOM\_tm1a (Coronal)  
 Nup85\_HET\_tm1a (Coronal)  
 Nutm2\_HOM\_tm2b (Coronal)  
 Nxn\_HET\_tm1b (Coronal)  
 Oaf\_HOM\_tm1a (Coronal)  
 Oas1g\_HOM\_tm3e (Coronal)  
 Oasi2\_HOM\_tm1a (Coronal)  
 Ocm\_HOM\_tm1e (Coronal)  
 Ogdh\_HET\_tm1e (Coronal)  
 Ogfod1\_HOM\_tm1a (Coronal)  
 Oog2\_HOM\_tm1a (Coronal)  
 Optn\_HOM\_tm1a (Coronal)  
 Orc1\_HET\_tm1a (Coronal)  
 Orc3\_HET\_tm1a (Coronal)  
 Os9\_HOM\_tm1a (Coronal)  
 Osbp13\_HOM\_tm1a (Coronal)  
 Osbp19\_HOM\_tm1a (Coronal)  
 Otub2\_HOM\_tm1a (Coronal)  
 Otud6b\_HOM\_tm1a (Coronal)  
 Otud7b\_HET\_tm1b (Coronal)  
 Oxr1\_HET\_tm1a (Coronal)  
 Pabpc1l\_HOM\_tm1a (Coronal)  
 Pabpc4\_HOM\_tm1a (Coronal)  
 Pabpc4\_HOM\_tm1e (Coronal)  
 Pabpn1l\_HOM\_tm1a (Coronal)  
 Pacsin3\_HOM\_tm1a (Coronal)  
 Pam16\_HET\_tm1b (Coronal)  
 Pbdcl\_HEMI\_tm2a (Coronal)  
 Pced1a\_HOM\_tm1b (Coronal)  
 Pclaf\_HOM\_tm1a (Coronal)  
 Pcdcl\_HET\_tm1b (Coronal)  
 Pdia4\_HOM\_tm1b (Coronal)  
 Pdk3\_HEMI\_tm2a (Coronal)  
 Pds5b\_HET\_tm1a (Coronal)  
 Pdxk\_HET\_tm1a (Coronal)  
 Pdzd3\_HOM\_tm1a (Coronal)  
 Pdzk1\_HET\_tm2b (Coronal)  
 Pear1\_HOM\_tm1a (Coronal)  
 Pepd\_HOM\_tm1a (Coronal)  
 Pex3\_HOM\_tm1a (Coronal)  
 Pfkfb4\_HOM\_tm1a (Coronal)  
 Pflk\_HET\_tm1a (Coronal)  
 Pfn1\_HET\_tm1a (Coronal)  
 Pgap2\_HET\_tm1b (Coronal)  
 Phf20\_HET\_tm1a (Coronal)  
 Phf20\_HOM\_tm1a (Coronal)  
 Phf2\_HOM\_tm1a (Coronal)  
 Pias2\_HOM\_tm1a (Coronal)  
 Pigf\_HET\_tm1a (Coronal)  
 Pigl\_HET\_tm1b (Coronal)  
 Pik3cb\_HET\_tm1a (Coronal)

1\_TBA  
 1\_LV  
 1\_Cg  
 1\_Cg\_Width  
 1\_Cg\_Height  
 1\_gcc  
 1\_gcc\_Width\_T  
 1\_gcc\_Width\_B  
 1\_gcc\_Height  
 1\_CPU  
 1\_aca  
 1\_Pir  
 1\_M1  
 1\_S2  
 2\_TBA  
 2\_LV  
 2\_D3V  
 2\_RSGC  
 2\_RSGC\_Width  
 2\_RSGC\_Height  
 2\_cc  
 2\_cc\_Width  
 2\_dhc  
 2\_Height  
 2\_AM  
 2\_Pir  
 2\_Ic  
 2\_opt  
 2\_rlr  
 2\_Ill  
 2\_Hb  
 2\_HP  
 2\_TILpy  
 2\_DG  
 2\_Mol  
 2\_Rad  
 2\_Or  
 2\_M1  
 2\_S2  
 3\_TBA  
 3\_4V  
 3\_Pois  
 3\_Py  
 3\_g7  
 3\_CN  
 3\_Lat  
 3\_InA  
 3\_IgL

Increase

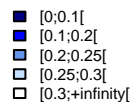

Decrease

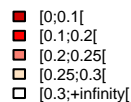

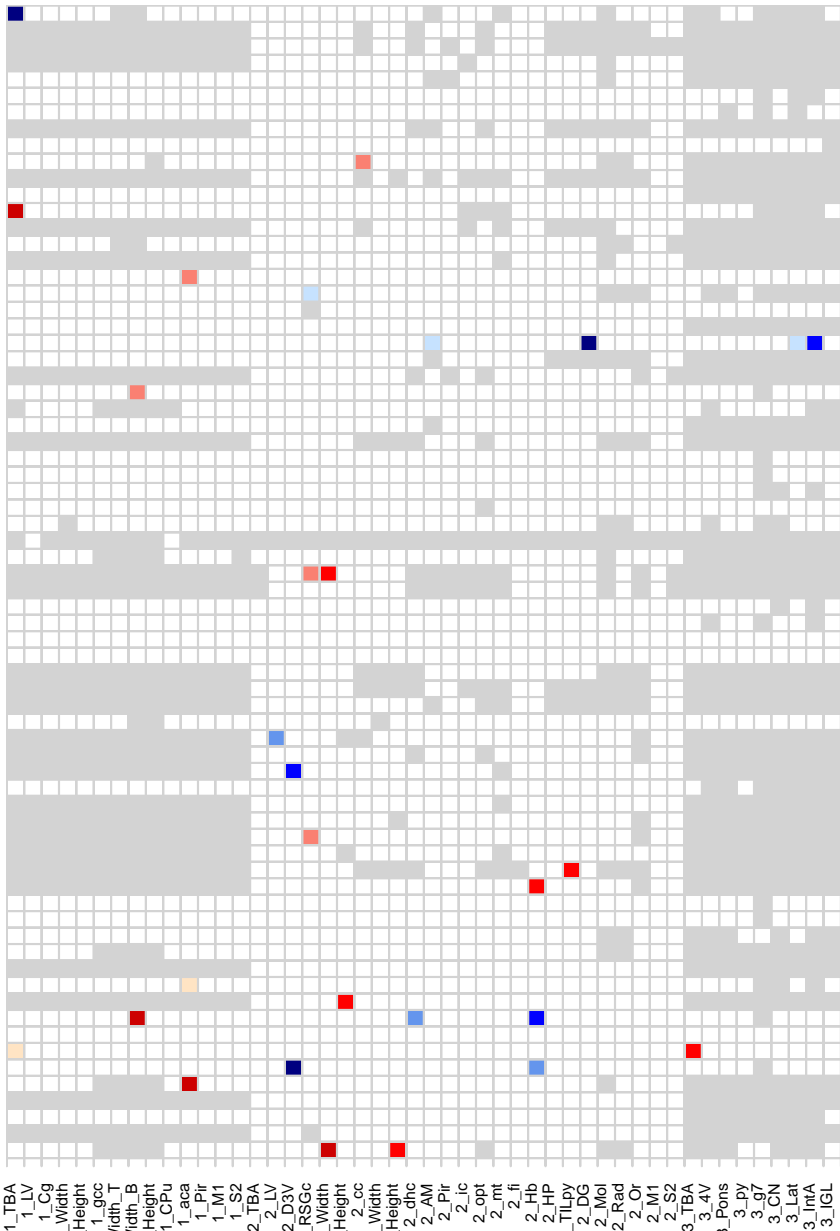

Pik3cb\_HOM\_tm1a (Coronal)  
 Pik3cg\_HOM\_tm1a (Coronal)  
 Pik3r2\_HOM\_tm1e (Coronal)  
 Pip5k1c\_HET\_tm1a (Coronal)  
 Pitpm1\_HOM\_tm1a (Coronal)  
 Pitrm1\_HET\_tm1a (Coronal)  
 Pla2g6\_HOM\_tm1a (Coronal)  
 Plbd1\_HOM\_tm1a (Coronal)  
 Pld3\_HOM\_tm1e (Coronal)  
 Pld5\_HOM\_tm1b (Coronal)  
 Pld5\_HOM\_tm1b (Coronal)  
 Plekhg1\_HOM\_tm1a (Coronal)  
 Plekhm2\_HOM\_tm1a (Coronal)  
 Plekhm2\_HOM\_tm1a (Coronal)  
 Plet1\_HOM\_em1 (Coronal)  
 Plin2\_HOM\_tm1a (Coronal)  
 Pls3\_HEMI\_tm1a (Coronal)  
 Plscr2\_HOM\_tm1b (Coronal)  
 Plxna2\_HOM\_tm1a (Coronal)  
 Plxnb2\_HET\_tm1a (Coronal)  
 Plxnb3\_HEMI\_tm1a (Coronal)  
 Pnpo\_HET\_tm1a (Coronal)  
 Pnpt1\_HET\_tm1a (Coronal)  
 Polb\_HET\_tm1a (Coronal)  
 Pold3\_HET\_tm1b (Coronal)  
 Polg2\_HET\_tm1a (Coronal)  
 Polr1e\_HET\_tm1a (Coronal)  
 Polr3f\_HET\_tm1a (Coronal)  
 Polr3g\_HET\_tm1a (Coronal)  
 Pop4\_HET\_tm1a (Coronal)  
 Ppiil3\_HOM\_tm1b (Coronal)  
 Ppp1r42\_HOM\_tm1a (Coronal)  
 Ppp2r2b\_HOM\_tm1a (Coronal)  
 Ppp3ca\_HOM\_tm2e (Coronal)  
 Ppp5c\_HOM\_tm1a (Coronal)  
 Ppp5c\_HOM\_tm1a (Coronal)  
 Pqlc3\_HOM\_tm1a (Coronal)  
 Praf2\_HEMI\_tm1e (Coronal)  
 Prame\_HEMI\_tm1a (Coronal)  
 Pramef20\_HOM\_tm1b (Coronal)  
 Prdx6\_HOM\_tm1a (Coronal)  
 Prkab1\_HET\_Gt (Coronal)  
 Prkab1\_HOM\_tm1a (Coronal)  
 Prkab1\_HOM\_tm1b (Coronal)  
 Prkcz\_HET\_tm1a (Coronal)  
 Prkcz\_HOM\_tm1a (Coronal)  
 Prmt1\_HET\_tm1a (Coronal)  
 Prmt2\_HOM\_tm1a (Coronal)  
 Prmt3\_HET\_tm1a (Coronal)  
 Prmt3\_HOM\_tm1a (Coronal)  
 Prmt5\_HET\_tm2a (Coronal)  
 Prmt7\_HOM\_tm1a (Coronal)  
 Prmt8\_HOM\_tm1a (Coronal)  
 Prpsap2\_HOM\_tm1a (Coronal)  
 Prrc2b\_HET\_tm1a (Coronal)  
 Prrg2\_HOM\_tm1b (Coronal)  
 Prrt2\_HOM\_tm1a (Coronal)  
 Prss52\_HOM\_tm2a (Coronal)  
 Psat1\_HET\_tm1a (Coronal)  
 Psph\_HET\_tm1a (Coronal)  
 Ptges2\_HOM\_tm1a (Coronal)  
 Pth\_HOM\_tm1a (Coronal)  
 Pth1r\_HET\_tm1a (Coronal)  
 Pth2r\_HOM\_tm2a (Coronal)  
 Pthlh\_HET\_tm1a (Coronal)  
 Ptprd\_HOM\_tm2a (Coronal)  
 Pus7l\_HOM\_tm2a (Coronal)  
 Pwp1\_HET\_tm1a (Coronal)  
 Pxylp1\_HOM\_tm1a (Coronal)  
 Pycr2\_HOM\_tm1a (Coronal)

1\_TBA  
 1\_LV  
 1\_Cg  
 1\_Cg\_Width  
 1\_Cg\_Height  
 1\_gcc  
 1\_gcc\_Width\_I  
 1\_gcc\_Width\_B  
 1\_gcc\_Height  
 1\_CPU  
 1\_aca  
 1\_Pir  
 1\_M1  
 1\_S2  
 2\_TBA  
 2\_LV  
 2\_D3V  
 2\_RSgc  
 2\_RSgc\_Width  
 2\_RSgc\_Height  
 2\_cc  
 2\_cc\_Width  
 2\_cc\_Height  
 2\_dhc  
 2\_AM  
 2\_Pir  
 2\_Ic  
 2\_opt  
 2\_rlr  
 2\_lli  
 2\_Hb  
 2\_HP  
 2\_TLpy  
 2\_DG  
 2\_Mol  
 2\_Rad  
 2\_Or  
 2\_M1  
 2\_S2  
 3\_TBA  
 3\_4V  
 3\_Pons  
 3\_py  
 3\_g7  
 3\_CN  
 3\_Lat  
 3\_IntA  
 3\_IgL



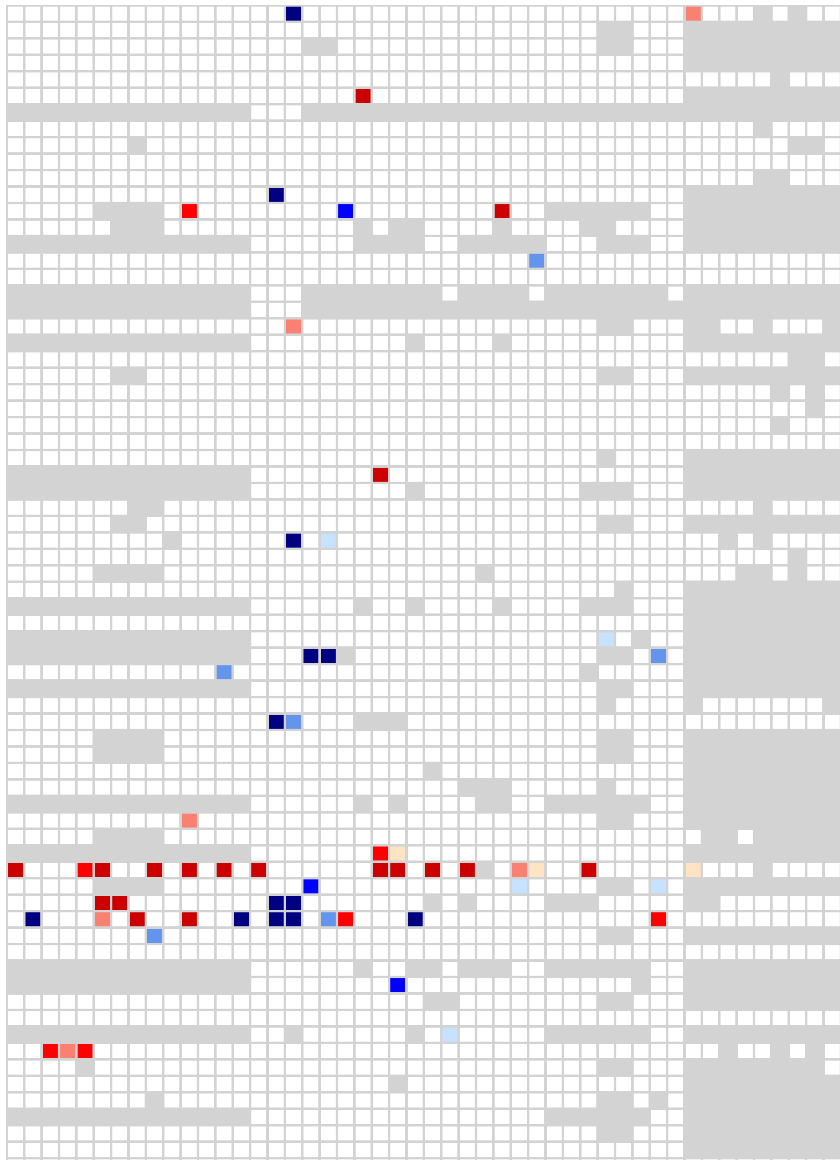

Rab15\_HOM\_tm1a (Coronal)  
 Rab17\_HOM\_tm1a (Coronal)  
 Rab21\_HET\_tm1b (Coronal)  
 Rab29\_HOM\_tm1a (Coronal)  
 Rab5c\_HET\_tm1a (Coronal)  
 Rad18\_HOM\_tm1a (Coronal)  
 Rad18\_HOM\_tm1a (Coronal)  
 Rala\_HET\_tm1a (Coronal)  
 Ralb\_HOM\_tm1a (Coronal)  
 Ralgapb\_HET\_tm1a (Coronal)  
 Ralgps2\_HOM\_tm1a (Coronal)  
 Rapgef1\_HOM\_tm1a (Coronal)  
 Raph1\_HOM\_tm1b (Coronal)  
 Rars\_HET\_tm1a (Coronal)  
 Rars2\_HET\_tm1a (Coronal)  
 Rasal2\_HOM\_tm1a (Coronal)  
 Rasgrp4\_HOM\_tm2a (Coronal)  
 Rassf1\_HET\_tm1.2 (Coronal)  
 Rassf1\_HOM\_tm1.2 (Coronal)  
 Rbak\_HOM\_tm1b (Coronal)  
 Rbbp7\_HEMI\_tm1a (Coronal)  
 Rbm14\_HOM\_tm1a (Coronal)  
 Rbm33\_HET\_tm1b (Coronal)  
 Rbm47\_HOM\_tm1a (Coronal)  
 Rbmx\_HEMI\_tm2a (Coronal)  
 Rbmx\_HEMI\_tm2b (Coronal)  
 Rbsn\_HET\_tm1a (Coronal)  
 Rcor2\_HET\_tm1a (Coronal)  
 Rcor2\_HOM\_tm1a (Coronal)  
 Rdh16\_HOM\_tm1a (Coronal)  
 Rdh16f2\_HOM\_tm1a (Coronal)  
 Reg3d\_HOM\_tm1b (Coronal)  
 Reg3g\_HOM\_tm1a (Coronal)  
 Repin1\_HOM\_tm1a (Coronal)  
 Retreg3\_HOM\_tm2a (Coronal)  
 Rtn2\_HOM\_tm1e (Coronal)  
 Rhd\_HOM\_tm1e (Coronal)  
 Rhd\_HOM\_tm1e (Coronal)  
 Rhobtb3\_HOM\_tm1a (Coronal)  
 Rhot1\_HET\_tm1a (Coronal)  
 Rhot2\_HOM\_tm1 (Coronal)  
 Rhou\_HOM\_tm1a (Coronal)  
 Rhox13\_HEMI\_tm1a (Coronal)  
 Rhox13\_HEMI\_tm1b (Coronal)  
 Rida\_HOM\_tm1a (Coronal)  
 Rimbp2\_HOM\_em1 (Coronal)  
 Ripk4\_HET\_tm1a (Coronal)  
 Ripply3\_HOM\_tm1a (Coronal)  
 Rnaseh2b\_HET\_tm1a (Coronal)  
 Rnaseh2c\_HET\_tm1 (Coronal)  
 Rnasek\_HET\_tm1b (Coronal)  
 Rnf10\_HOM\_tm1a (Coronal)  
 Rnf10\_HOM\_tm1b (Coronal)  
 Rnf125\_HOM\_tm1a (Coronal)  
 Rnf157\_HOM\_tm1b (Coronal)  
 Ropn11\_HOM\_tm1b (Coronal)  
 Rosa26\_HET\_Gt (Coronal)  
 Rosa26\_HET\_tm1 (Coronal)  
 Rosa26\_HOM\_Fki (Coronal)  
 Rpap2\_HET\_tm1a (Coronal)  
 Rpgrip11\_HET\_tm1a (Coronal)  
 Rpia\_HET\_tm1a (Coronal)  
 Rpn2\_HET\_tm1a (Coronal)  
 Rsad1\_HOM\_tm1 (Coronal)  
 Rspo4\_HOM\_tm1a (Coronal)  
 Rtdbn\_HET\_tm1a (Coronal)  
 Rtdbn\_HOM\_tm1a (Coronal)  
 Rtf1\_HET\_tm1a (Coronal)  
 Ruffy2\_HET\_tm1a (Coronal)  
 Ruffy2\_HOM\_tm1a (Coronal)

1\_TBA  
 1\_LV  
 1\_Cg  
 1\_Cg\_Width  
 1\_Cg\_Height  
 1\_gcc  
 1\_gcc\_Width\_I  
 1\_gcc\_Width\_B  
 1\_gcc\_Height  
 1\_CPU  
 1\_aca  
 1\_Pir  
 1\_M1  
 1\_S2  
 2\_TBA  
 2\_LV  
 2\_DAV  
 2\_RSgc  
 2\_RSgc\_Width  
 2\_RSgc\_Height  
 2\_cc  
 2\_cc\_Width  
 2\_cc\_Height  
 2\_dhc  
 2\_AM  
 2\_Pir  
 2\_Ic  
 2\_opt  
 2\_rlr  
 2\_zll  
 2\_Hb  
 2\_HP  
 2\_TILpy  
 2\_DG  
 2\_Mol  
 2\_Rad  
 2\_Or  
 2\_M1  
 2\_S2  
 3\_TBA  
 3\_4V  
 3\_Pons  
 3\_Py  
 3\_g7  
 3\_CN  
 3\_Lat  
 3\_IntA  
 3\_IgL

Increase  
 Decrease

|                   |                   |
|-------------------|-------------------|
| ■ [0;0.1[         | ■ [0;0.1[         |
| ■ [0.1;0.2[       | ■ [0.1;0.2[       |
| ■ [0.2;0.25[      | ■ [0.2;0.25[      |
| ■ [0.25;0.3[      | ■ [0.25;0.3[      |
| □ [0.3;+infinity[ | □ [0.3;+infinity[ |

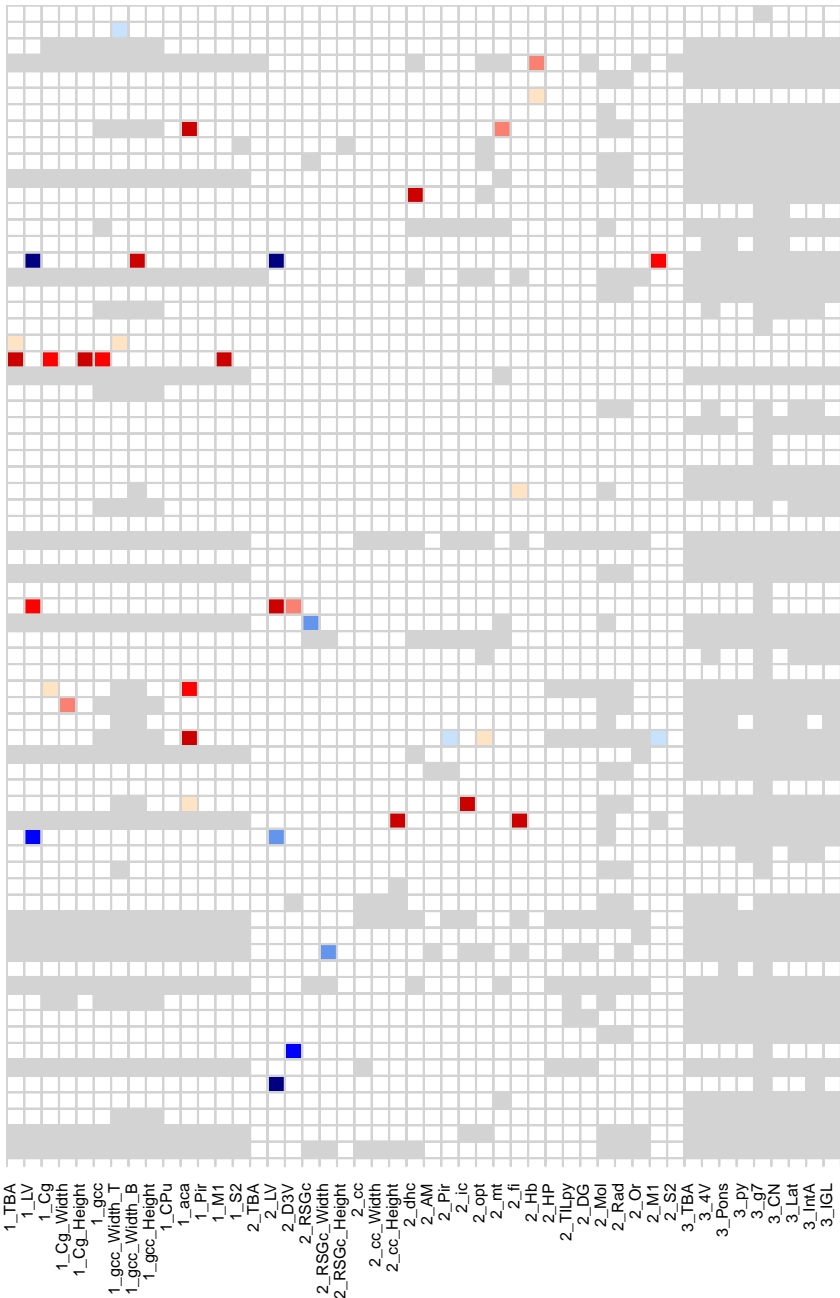

Rundc1\_HET\_tm1a (Coronal)  
 Rundc1\_HET\_tm1b (Coronal)  
 Rwd1\_HOM\_tm1b (Coronal)  
 S100b\_HOM\_tm1a (Coronal)  
 Sag\_HOM\_tm1a (Coronal)  
 Sap130\_HET\_tm1a (Coronal)  
 Sar1b\_HET\_tm1a (Coronal)  
 Scaf11\_HOM\_em1 (Coronal)  
 Scimp\_HOM\_tm1a (Coronal)  
 Scn3b\_HOM\_tm1a (Coronal)  
 Sco1\_HET\_tm1a (Coronal)  
 Sdhc\_HET\_tm1a (Coronal)  
 Sec1\_HOM\_tm1a (Coronal)  
 Sec16b\_HOM\_tm1a (Coronal)  
 Sec22b\_HET\_tm1a (Coronal)  
 Sec23a\_HET\_tm1a (Coronal)  
 Sec24a\_HOM\_tm1a (Coronal)  
 Secisbp2\_HOM\_tm1c (Coronal)  
 Seh1l\_HET\_tm1a (Coronal)  
 Sel1l\_HET\_tm1e (Coronal)  
 Selenok\_HOM\_tm1a (Coronal)  
 Selenok\_HOM\_tm1b (Coronal)  
 Selenon\_HOM\_tm1a (Coronal)  
 Selenow\_HOM\_tm1b (Coronal)  
 Sept10\_HET\_tm1a (Coronal)  
 Sept10\_HOM\_tm1a (Coronal)  
 Serinc3\_HOM\_tm1a (Coronal)  
 Serpina3c\_HOM\_tm1a (Coronal)  
 Sesn3\_HOM\_tm1a (Coronal)  
 Setd1a\_HET\_tm1a (Coronal)  
 Setd4\_HOM\_tm1a (Coronal)  
 Setd5\_HET\_tm1a (Coronal)  
 Setdb1\_HET\_tm1a (Coronal)  
 Setdb1\_HET\_tm1a (Coronal)  
 Setmar\_HOM\_tm1a (Coronal)  
 Sfxn3\_HOM\_tm1b (Coronal)  
 Sgms1\_HOM\_tm1a (Coronal)  
 Sgo1\_HET\_tm1a (Coronal)  
 Sgol2\_HOM\_tm1a (Coronal)  
 Sgsm1\_HOM\_tm1b (Coronal)  
 Sh2d5\_HOM\_tm1a (Coronal)  
 Sh3ggr3\_HOM\_tm2b (Coronal)  
 Sh3bp4\_HOM\_tm1a (Coronal)  
 Sh3pxd2a\_HET\_tm1b (Coronal)  
 Slik3\_HOM\_tm1a (Coronal)  
 Sirt2\_HOM\_tm1a (Coronal)  
 Sirt3\_HOM\_tm1a (Coronal)  
 Skida1\_HET\_tm1 (Coronal)  
 Slamf9\_HOM\_tm1b (Coronal)  
 Slc16a2\_HEMI\_tm1a (Coronal)  
 Slc16a4\_HOM\_tm2e (Coronal)  
 Slc16a6\_HOM\_tm1a (Coronal)  
 Slc1a4\_HOM\_tm1e (Coronal)  
 Slc20a2\_HET\_tm1a (Coronal)  
 Slc20a2\_HOM\_tm1a (Coronal)  
 Slc22a21\_HET\_tm1a (Coronal)  
 Slc22a21\_HOM\_tm1a (Coronal)  
 Slc23a4\_HOM\_tm1a (Coronal)  
 Slc25a20\_HET\_tm1a (Coronal)  
 Slc25a21\_HOM\_tm1a (Coronal)  
 Slc25a21\_HOM\_tm1b (Coronal)  
 Slc25a21\_HOM\_tm1c (Coronal)  
 Slc25a21\_HOM\_tm1d (Coronal)  
 Slc25a28\_HOM\_tm1b (Coronal)  
 Slc25a29\_HOM\_tm1a (Coronal)  
 Slc25a30\_HOM\_tm1a (Coronal)  
 Slc25a4\_HOM\_tm1a (Coronal)  
 Slc25a43\_HEMI\_tm1a (Coronal)  
 Slc30a8\_HOM\_tm1a (Coronal)  
 Slc35f1\_HOM\_tm1a (Coronal)

1\_TBA  
 1\_LV  
 1\_Cg  
 1\_Cg\_Width  
 1\_Cg\_Height  
 1\_gcc  
 1\_gcc\_Width\_T  
 1\_gcc\_Width\_B  
 1\_gcc\_Height  
 1\_CPu  
 1\_aca  
 1\_Pir  
 1\_M1  
 1\_S2  
 2\_TBA  
 2\_LV  
 2\_D3V  
 2\_RSgc  
 2\_RSgc\_Width  
 2\_RSgc\_Height  
 2\_cc  
 2\_cc\_Width  
 2\_cc\_Height  
 2\_dhc  
 2\_AM  
 2\_Pir  
 2\_ic  
 2\_opt  
 2\_rlr  
 2\_lli  
 2\_HP  
 2\_Hb  
 2\_Tlly  
 2\_DG  
 2\_Mol  
 2\_Rad  
 2\_Or  
 2\_M1  
 2\_S2  
 3\_TBA  
 3\_4V  
 3\_Pois  
 3\_Py  
 3\_g7  
 3\_CN  
 3\_Lat  
 3\_IntA  
 3\_Igl

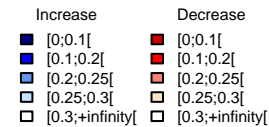

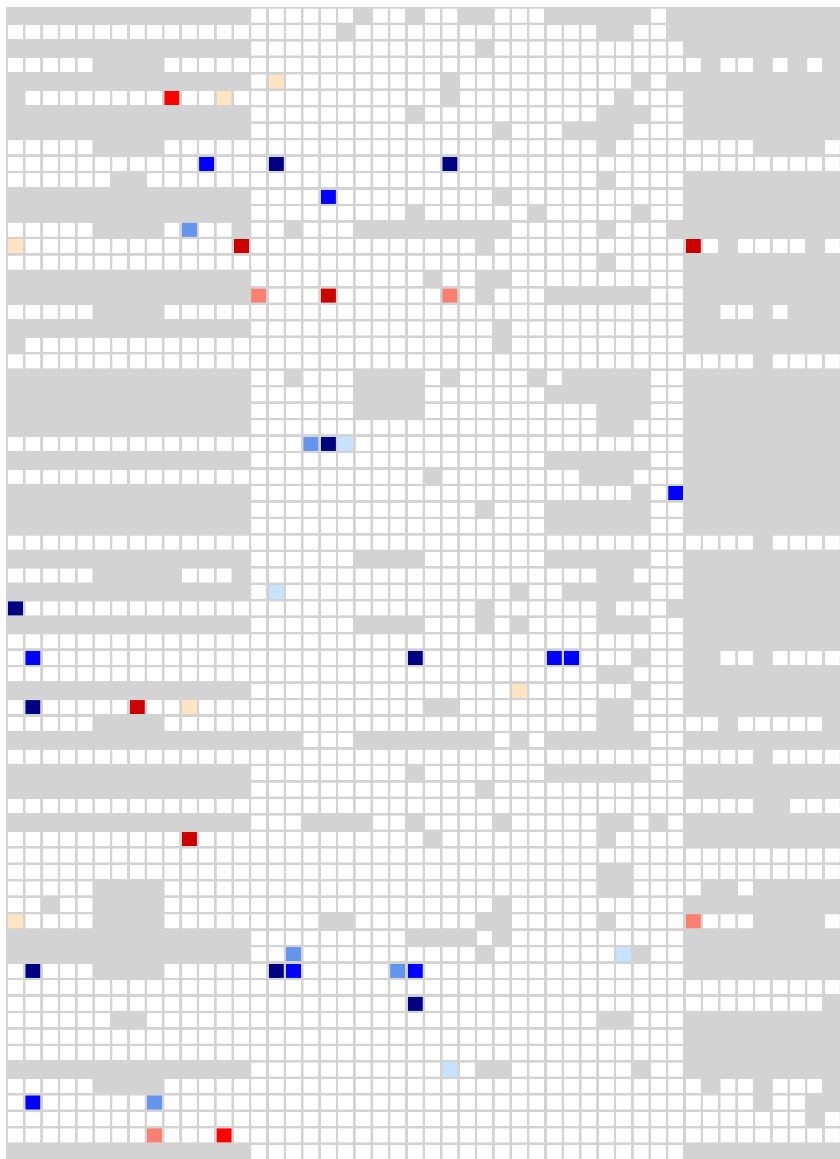

Slc35f6\_HOM\_tm1a (Coronal)  
 Slc38a10\_HOM\_tm1a (Coronal)  
 Slc38a10\_HOM\_tm1a (Coronal)  
 Slc38a2\_HET\_tm1a (Coronal)  
 Slc41a3\_HOM\_tm1a (Coronal)  
 Slc44a5\_HOM\_tm1a (Coronal)  
 Slc52a3\_HET\_tm2a (Coronal)  
 Slc5a2\_HOM\_tm1a (Coronal)  
 Slc5a6\_HET\_tm1a (Coronal)  
 Slc5a7\_HET\_tm1a (Coronal)  
 Slc9a3r2\_HOM\_tm2a (Coronal)  
 Slc9a8\_HOM\_tm1a (Coronal)  
 Slc9a8\_HOM\_tm1a (Coronal)  
 Slco2b1\_HOM\_tm1a (Coronal)  
 Sliitrk4\_HEMI\_tm1b (Coronal)  
 Slu7\_HET\_tm1a (Coronal)  
 Slx4\_HET\_tm1a (Coronal)  
 Slx4\_HOM\_tm1a (Coronal)  
 Slx4ip\_HOM\_tm1a (Coronal)  
 Smarcal1\_HOM\_tm1a (Coronal)  
 Smc3\_HET\_tm1a (Coronal)  
 Smpd4\_HET\_tm2b (Coronal)  
 Sms\_HEMI\_tm1a (Coronal)  
 Smyd2\_HOM\_tm1a (Coronal)  
 Smyd3\_HOM\_tm2a (Coronal)  
 Smyd4\_HOM\_tm1a (Coronal)  
 Smyd5\_HOM\_tm1a (Coronal)  
 Smyd5\_HOM\_tm1e (Coronal)  
 Snap47\_HOM\_tm1a (Coronal)  
 Snapc4\_HET\_tm1a (Coronal)  
 Snf8\_HET\_tm1a (Coronal)  
 Snip1\_HET\_tm1a (Coronal)  
 Snx31\_HOM\_tm1a (Coronal)  
 Snx5\_HOM\_tm1a (Coronal)  
 Snx8\_HOM\_tm2a (Coronal)  
 Socs7\_HOM\_tm1a (Coronal)  
 Sparc\_HOM\_tm1a (Coronal)  
 Sparc\_HOM\_tm1a (Coronal)  
 Spata25\_HOM\_tm1 (Coronal)  
 Spink10\_HOM\_tm1a (Coronal)  
 Spink14\_HOM\_tm1e (Coronal)  
 Spns2\_HOM\_tm1a (Coronal)  
 Spns2\_HOM\_tm1b (Coronal)  
 Spopl\_HOM\_tm1a (Coronal)  
 Sptbn1\_HET\_tm1a (Coronal)  
 Sqle\_HET\_tm1a (Coronal)  
 Sqstm1\_HOM\_tm1a (Coronal)  
 Src\_HET\_tm2a (Coronal)  
 Srrm4\_HET\_tm1e (Coronal)  
 Srsf4\_HET\_tm1a (Coronal)  
 Srsf4\_HOM\_tm1a (Coronal)  
 Srsf7\_HET\_tm1a (Coronal)  
 Ssbp1\_HET\_tm1a (Coronal)  
 Ssr2\_HET\_tm1b (Coronal)  
 St18\_HOM\_tm1a (Coronal)  
 St18\_HOM\_tm1a (Coronal)  
 Stard13\_HOM\_tm1a (Coronal)  
 Stard5\_HOM\_tm1a (Coronal)  
 Stard6\_HOM\_tm1a (Coronal)  
 Stard8\_HEMI\_tm1a (Coronal)  
 Stard8\_HEMI\_tm1b (Coronal)  
 Stau2\_HOM\_tm1a (Coronal)  
 Stk32a\_HOM\_tm1a (Coronal)  
 Stk39\_HOM\_tm1a (Coronal)  
 Stx8\_HOM\_tm2a (Coronal)  
 Stxbp4\_HOM\_tm1a (Coronal)  
 Sult1c1\_HOM\_tm1b (Coronal)  
 Supt3\_HET\_tm1a (Coronal)  
 Supt5\_HET\_tm2a (Coronal)  
 Supt7L\_HET\_tm1a (Coronal)

1\_TBA  
 1\_LV  
 1\_Cg  
 1\_Cg\_Width  
 1\_Cg\_Height  
 1\_gcc  
 1\_gcc\_Width\_T  
 1\_gcc\_Width\_B  
 1\_gcc\_Height  
 1\_CPu  
 1\_Pir  
 1\_aca  
 1\_Pir  
 1\_M1  
 1\_S2  
 2\_TBA  
 2\_LV  
 2\_D3V  
 2\_RSgc  
 2\_RSgc\_Width  
 2\_RSgc\_Height  
 2\_cc  
 2\_cc\_Width  
 2\_dhc  
 2\_Height  
 2\_AM  
 2\_Pir  
 2\_Pir  
 2\_ic  
 2\_opt  
 2\_rtr  
 2\_lli  
 2\_HB  
 2\_HP  
 2\_TLby  
 2\_DG  
 2\_Mol  
 2\_Rad  
 2\_Rad  
 2\_Or  
 2\_M1  
 2\_S2  
 2\_S2  
 3\_TBA  
 3\_4V  
 3\_Pois  
 3\_py  
 3\_g7  
 3\_CN  
 3\_Lat  
 3\_IntA  
 3\_IgL





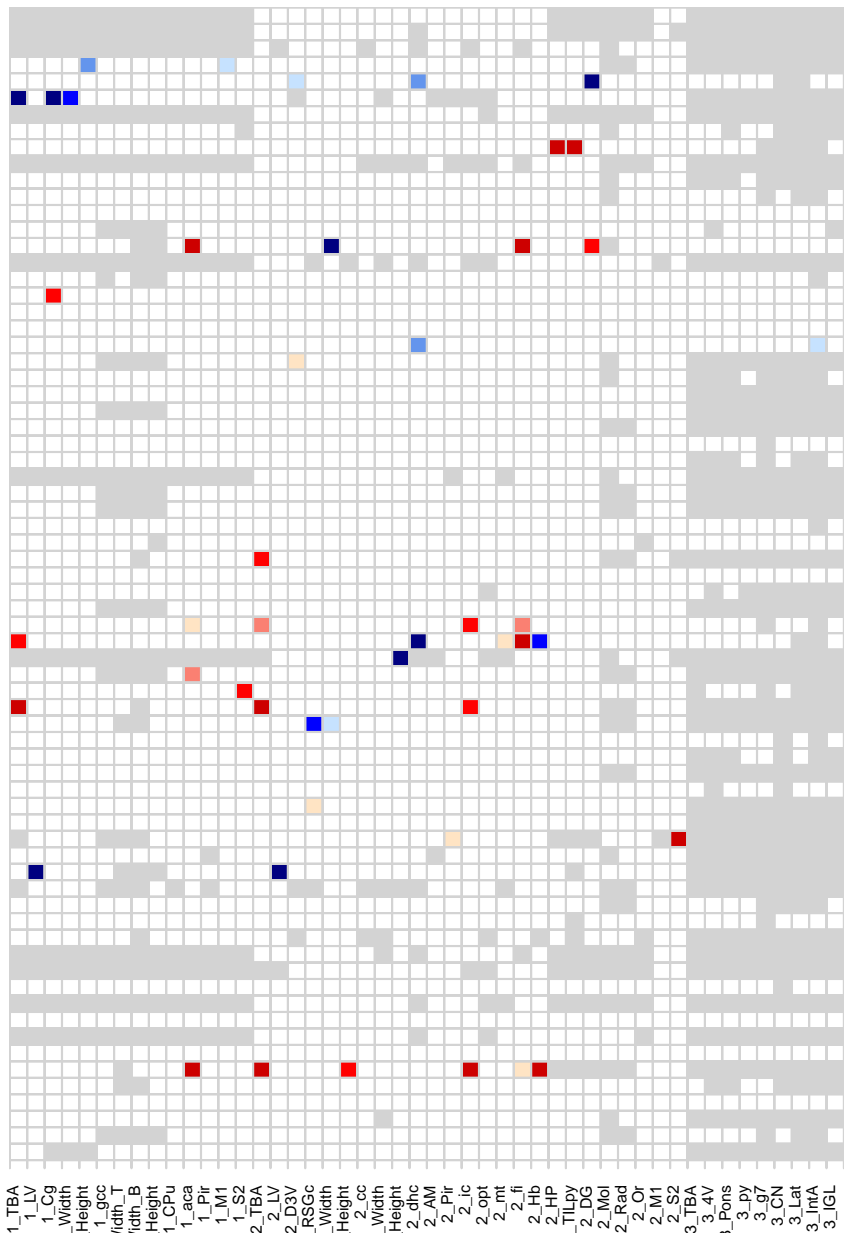

Supv311\_HET\_tm1a (Coronal)  
 Sympk\_HET\_tm1a (Coronal)  
 Synj2\_HOM\_tm1a (Coronal)  
 Svt1\_HET\_tm1a (Coronal)  
 Svt16\_HOM\_tm1a (Coronal)  
 Svt1\_HOM\_tm1a (Coronal)  
 Svt1\_HOM\_tm1a (Coronal)  
 Tatdn3\_HOM\_tm1a (Coronal)  
 Tatdn3\_HOM\_tm1b (Coronal)  
 Tbc1d10a\_HOM\_tm2a (Coronal)  
 Tbc1d22a\_HOM\_tm1b (Coronal)  
 Tceal5\_HEML\_tm1a (Coronal)  
 Tceal5\_HEML\_tm1b (Coronal)  
 Tceal9\_HEML\_tm1a (Coronal)  
 Tcf4\_HET\_tm1a (Coronal)  
 Tcf711\_HET\_tm1a (Coronal)  
 Tcf712\_HET\_tm1a (Coronal)  
 Tchp\_HOM\_tm1a (Coronal)  
 Tcpl1\_HOM\_tm1a (Coronal)  
 Tcte1\_HOM\_tm1a (Coronal)  
 Tctex1d2\_HOM\_tm1e (Coronal)  
 Tead3\_HOM\_tm1a (Coronal)  
 Tepsin\_HOM\_tm1b (Coronal)  
 Tet1\_HET\_tm1a (Coronal)  
 Tex38\_HOM\_tm1a (Coronal)  
 Tff1\_HOM\_tm1a (Coronal)  
 Tgfb11\_HOM\_tm1b (Coronal)  
 Tgm6\_HOM\_tm1a (Coronal)  
 Themis2\_HOM\_tm1a (Coronal)  
 Timeless\_HET\_tm1b (Coronal)  
 Timmdc1\_HET\_tm1b (Coronal)  
 Tk1\_HET\_tm1 (Coronal)  
 Tk1\_HOM\_tm1 (Coronal)  
 Tm9sf4\_HOM\_tm1a (Coronal)  
 Tmc3\_HOM\_tm2b (Coronal)  
 Tmc6\_HOM\_tm1a (Coronal)  
 Tmem110\_HOM\_tm2b (Coronal)  
 Tmem126a\_HOM\_tm1a (Coronal)  
 Tmem127\_HOM\_tm1 (Coronal)  
 Tmem165\_HOM\_tm1e (Coronal)  
 Tmem18\_HOM\_tm1b (Coronal)  
 Tmem185a\_HEML\_tm1a (Coronal)  
 Tmem189\_HOM\_tm1a (Coronal)  
 Tmem241\_HOM\_tm1b (Coronal)  
 Tmem254b\_HOM\_tm1a (Coronal)  
 Tmem30a\_HET\_tm1a (Coronal)  
 Tmem37\_HOM\_tm1a (Coronal)  
 Tmem42\_HOM\_tm1b (Coronal)  
 Tmem9\_HOM\_tm1a (Coronal)  
 Tmem98\_HET\_tm1a (Coronal)  
 Tmod1\_HET\_tm1a (Coronal)  
 Tmprss15\_HOM\_tm1a (Coronal)  
 Tnfaip1\_HOM\_tm1a (Coronal)  
 Tnik\_HOM\_tm3a (Coronal)  
 Tomm20L\_HOM\_tm1a (Coronal)  
 Tomm20L\_HOM\_tm1b (Coronal)  
 Top3b\_HOM\_gt (Coronal)  
 Tpd52l2\_HOM\_tm1a (Coronal)  
 Tpi1\_HET\_tm1a (Coronal)  
 Traf2\_HET\_tm1a (Coronal)  
 Traf3ip3\_HOM\_tm1a (Coronal)  
 Traf6\_HET\_tm2a (Coronal)  
 Trafid1\_HOM\_tm1a (Coronal)  
 Tram2\_HOM\_tm1a (Coronal)  
 Trappc10\_HOM\_tm1b (Coronal)  
 Trappc9\_HOM\_tm1a (Coronal)  
 Trem1\_HOM\_tm1 (Coronal)  
 Trex1\_HET\_tm1 (Coronal)  
 Trim17\_HOM\_tm1e (Coronal)  
 Trim21\_HOM\_em1 (Coronal)

1\_TBA  
 1\_LV  
 1\_Cg  
 1\_Cg\_Width  
 1\_Cg\_Height  
 1\_gcc  
 1\_gcc\_Width\_T  
 1\_gcc\_Width\_B  
 1\_gcc\_Height  
 1\_CPu  
 1\_aca  
 1\_Pir  
 1\_M1  
 1\_S2  
 2\_TBA  
 2\_LV  
 2\_D3V  
 2\_RSgc  
 2\_RSgc\_Width  
 2\_RSgc\_Height  
 2\_cc  
 2\_cc\_Width  
 2\_dhc  
 2\_Height  
 2\_AM  
 2\_Pir  
 2\_Ic  
 2\_opt  
 2\_rlr  
 2\_lli  
 2\_Hb  
 2\_HP  
 2\_DG  
 2\_TLpy  
 2\_Mol  
 2\_Rad  
 2\_Or  
 2\_M1  
 2\_S2  
 3\_TBA  
 3\_4V  
 3\_Py  
 3\_g7  
 3\_CN  
 3\_Lat  
 3\_IntA  
 3\_IgL

Increase

Decrease

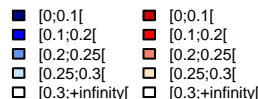

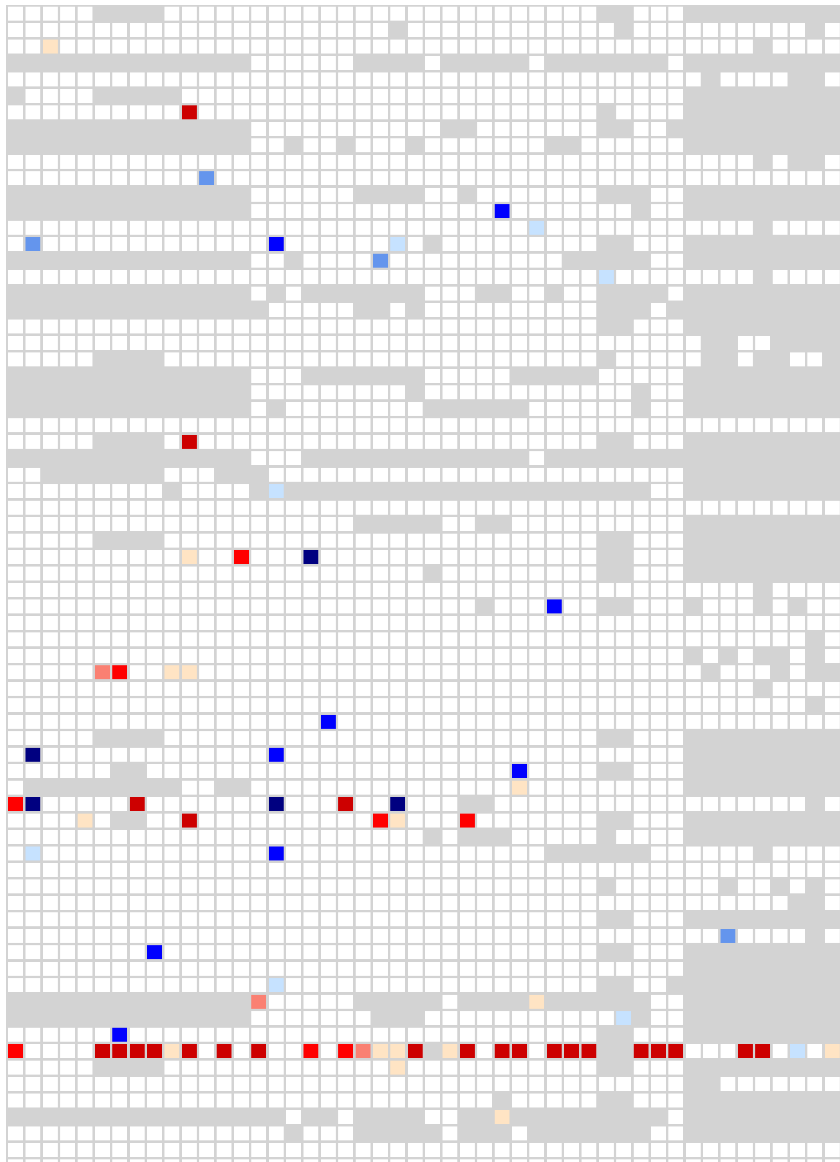

Trim25\_HOM\_tm2b (Coronal)  
 Trim29\_HOM\_tm1a (Coronal)  
 Trim29\_HOM\_tm1b (Coronal)  
 Trim45\_HET\_tm1a (Coronal)  
 Trim56\_HOM\_tm1a (Coronal)  
 Trim65\_HOM\_tm1b (Coronal)  
 Trim66\_HOM\_tm1a (Coronal)  
 Trmo\_HOM\_tm1a (Coronal)  
 Trmt10a\_HOM\_tm1a (Coronal)  
 Trmt2a\_HOM\_tm2b (Coronal)  
 Trp53rb\_HOM\_tm1a (Coronal)  
 Trpc4ap\_HET\_tm1a (Coronal)  
 Trrap\_HET\_tm1a (Coronal)  
 Trub2\_HET\_tm2a (Coronal)  
 Tsfm\_HET\_tm1a (Coronal)  
 Ttc39b\_HOM\_tm1e (Coronal)  
 Ttl11\_HOM\_tm1a (Coronal)  
 Ttl3\_HOM\_tm1a (Coronal)  
 Ttl3\_HOM\_tm1a (Coronal)  
 Ttl4\_HOM\_tm1a (Coronal)  
 Tuba3a\_HOM\_tm1b (Coronal)  
 Tuff1\_HOM\_tm1a (Coronal)  
 Twf1\_HOM\_tm1a (Coronal)  
 Uba2\_HET\_tm1a (Coronal)  
 Ubap1\_HET\_tm1a (Coronal)  
 Ubash3a\_HOM\_tm1a (Coronal)  
 Ube2d1\_HOM\_tm3e (Coronal)  
 Ube3b\_HET\_Gt (Coronal)  
 Ubxn10\_HOM\_tm1b (Coronal)  
 Uck1\_HOM\_tm2a (Coronal)  
 Uevld\_HOM\_tm1a (Coronal)  
 Ufl1\_HET\_tm1a (Coronal)  
 Umod11\_HOM\_tm1a (Coronal)  
 Unk\_HOM\_tm1a (Coronal)  
 Upp1\_HOM\_tm1a (Coronal)  
 Uri1\_HOM\_tm1a (Coronal)  
 Ush1c\_HOM\_tm1a (Coronal)  
 Ushbp1\_HOM\_tm1a (Coronal)  
 Usp11\_HEMI\_tm1 (Coronal)  
 Usp20\_HOM\_tm1a (Coronal)  
 Usp21\_HOM\_tm1a (Coronal)  
 Usp22\_HET\_tm1a (Coronal)  
 Usp24\_HOM\_tm1a (Coronal)  
 Usp3\_HET\_tm1a (Coronal)  
 Usp30\_HOM\_tm2b (Coronal)  
 Usp33\_HOM\_tm1a (Coronal)  
 Usp37\_HET\_em1 (Coronal)  
 Usp42\_HOM\_tm2a (Coronal)  
 Usp5\_HET\_tm1a (Coronal)  
 Vamp3\_HOM\_tm2b (Coronal)  
 Vangl1\_HET\_tm1e (Coronal)  
 Virma\_HET\_tm1a (Coronal)  
 Vps13a\_HOM\_tm1b (Coronal)  
 Vps33b\_HET\_tm1a (Coronal)  
 Vps51\_HET\_tm1a (Coronal)  
 Vps53\_HET\_tm1a (Coronal)  
 Vps72\_HET\_tm1a (Coronal)  
 Vwa3a\_HOM\_tm1b (Coronal)  
 Vwa5b1\_HOM\_tm1a (Coronal)  
 Washc2\_HET\_tm2b (Coronal)  
 Wbp2\_HOM\_tm1a (Coronal)  
 Wdr3\_HET\_tm1a (Coronal)  
 Wdr37\_HOM\_tm1a (Coronal)  
 Wdr47\_HOM\_tm1a (Coronal)  
 Wdr89\_HOM\_tm1a (Coronal)  
 Wdtdc1\_HOM\_tm1a (Coronal)  
 Wfdc18\_HOM\_tm1a (Coronal)  
 Whrn\_HOM/HET\_wi (Coronal)  
 Whrn\_HOM\_tm1a (Coronal)  
 Wnt16\_HET\_tm2b (Coronal)

1\_TBA  
 1\_LV  
 1\_Cg  
 1\_Cg\_Width  
 1\_Cg\_Height  
 1\_gcc  
 1\_gcc\_Width\_T  
 1\_gcc\_Width\_B  
 1\_gcc\_Height  
 1\_CPu  
 1\_Pir  
 1\_aca  
 1\_Pir  
 1\_M1  
 1\_S2  
 2\_TBA  
 2\_LV  
 2\_D3V  
 2\_RSgc  
 2\_RSgc\_Width  
 2\_cc  
 2\_cc\_Width  
 2\_dhc  
 2\_Height  
 2\_Pir  
 2\_AM  
 2\_Pir  
 2\_IC  
 2\_opt  
 2\_nrl  
 2\_JH  
 2\_HB  
 2\_HP  
 2\_TLpy  
 2\_DG  
 2\_Mol  
 2\_Rad  
 2\_Or  
 2\_M1  
 2\_S2  
 3\_TBA  
 3\_4V  
 3\_Pois  
 3\_Py  
 3\_g7  
 3\_CN  
 3\_Lat  
 3\_IntA  
 3\_IgL

Increase  
 Decrease

|                   |                   |
|-------------------|-------------------|
| ■ [0;0.1[         | ■ [0;0.1[         |
| ■ [0.1;0.2[       | ■ [0.1;0.2[       |
| ■ [0.2;0.25[      | ■ [0.2;0.25[      |
| ■ [0.25;0.3[      | ■ [0.25;0.3[      |
| □ [0.3;+infinity[ | □ [0.3;+infinity[ |

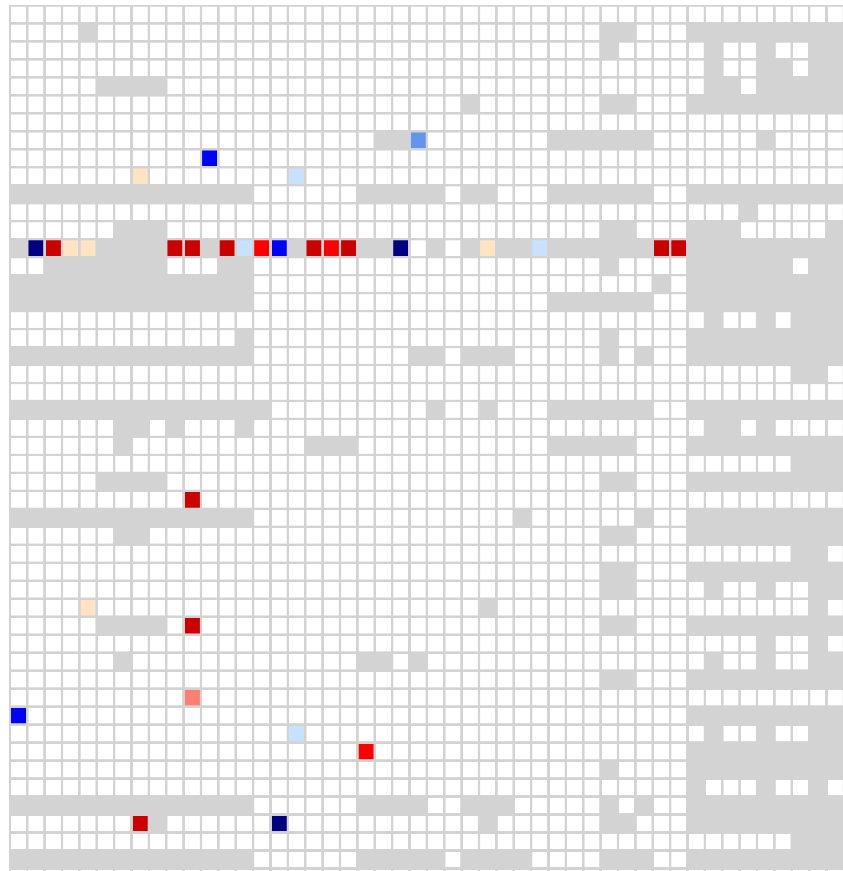

Wnt16\_HET\_tm2b (Coronal)  
 Wnt3\_HET\_tm2a (Coronal)  
 Wrap53\_HET\_tm1b (Coronal)  
 Xbp1\_HET\_tm1a (Coronal)  
 Xkrx\_HEMI\_tm1b (Coronal)  
 Xndc1\_HOM\_tm1a (Coronal)  
 Xpnp1\_HET\_tm1a (Coronal)  
 Xpnp1\_HOM\_tm1a (Coronal)  
 Xylt1\_HOM\_tm1a (Coronal)  
 Ydjc\_HOM\_tm1 (Coronal)  
 Yipf1\_HOM\_tm1a (Coronal)  
 Yipf7\_HOM\_tm1e (Coronal)  
 Ypel4\_HOM\_tm1a (Coronal)  
 Ywhae\_HOM\_tm1e (Coronal)  
 Zbed5\_HOM\_tm1b (Coronal)  
 Zc3hc1\_HET\_tm1a (Coronal)  
 Zc3hc1\_HOM\_tm1a (Coronal)  
 Zcchc14\_HET\_tm1a (Coronal)  
 Zfp106\_HET\_tm1a (Coronal)  
 Zfp106\_HOM\_tm1a (Coronal)  
 Zfp182\_HEMI\_tm1a (Coronal)  
 Zfp182\_HEMI\_tm1b (Coronal)  
 Zfp184\_HOM\_tm1a (Coronal)  
 Zfp239\_HOM\_tm1b (Coronal)  
 Zfp266\_HOM\_tm1b (Coronal)  
 Zfp287\_HOM\_tm1b (Coronal)  
 Zfp341\_HOM\_tm1a (Coronal)  
 Zfp365\_HOM\_tm1a (Coronal)  
 Zfp367\_HOM\_tm1a (Coronal)  
 Zfp408\_HOM\_tm1b (Coronal)  
 Zfp616\_HOM\_tm1b (Coronal)  
 Zfp658\_HOM\_tm1b (Coronal)  
 Zfp719\_HOM\_tm1a (Coronal)  
 Zfp719\_HOM\_tm1b (Coronal)  
 Zfp763\_HOM\_em2 (Coronal)  
 Zfp791\_HOM\_tm1a (Coronal)  
 Zfp84\_HOM\_tm1b (Coronal)  
 Zfp879\_HOM\_tm2b (Coronal)  
 Zfyve28\_HOM\_tm1b (Coronal)  
 Zkscan14\_HET\_tm1a (Coronal)  
 Zkscan17\_HET\_tm1b (Coronal)  
 Zmynd8\_HET\_tm1a (Coronal)  
 Zp1\_HOM\_tm1a (Coronal)  
 Zranb1\_HOM\_tm1a (Coronal)  
 Zranb2\_HET\_tm1a (Coronal)  
 Zscan10\_HET\_tm2a (Coronal)  
 Zscan2\_HOM\_tm1a (Coronal)  
 Zzz3\_HET\_tm1a (Coronal)

1\_TBA  
 1\_LV  
 1\_Cg  
 1\_Cg\_Width  
 1\_Cg\_Height  
 1\_gcc  
 1\_gcc\_Width\_I  
 1\_gcc\_Width\_B  
 1\_gcc\_Height  
 1\_CPU  
 1\_eca  
 1\_Pir  
 1\_M1  
 1\_S2  
 2\_TBA  
 2\_LV  
 2\_D3V  
 2\_RSGc  
 2\_RSGc\_Width  
 2\_RSGc\_Height  
 2\_cc  
 2\_cc\_Width  
 2\_cc\_Height  
 2\_dhc  
 2\_AM  
 2\_Pir  
 2\_Ic  
 2\_opt  
 2\_mt  
 2\_I1  
 2\_I2  
 2\_Hb  
 2\_HP  
 2\_TILPy  
 2\_DG  
 2\_Mol  
 2\_Read  
 2\_Or  
 2\_M1  
 2\_S2  
 3\_TBA  
 3\_4V  
 3\_Pois  
 3\_Py  
 3\_97  
 3\_CN  
 3\_Lat  
 3\_IntA  
 3\_IgL

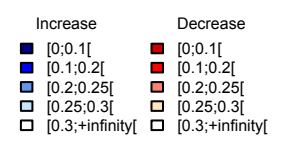

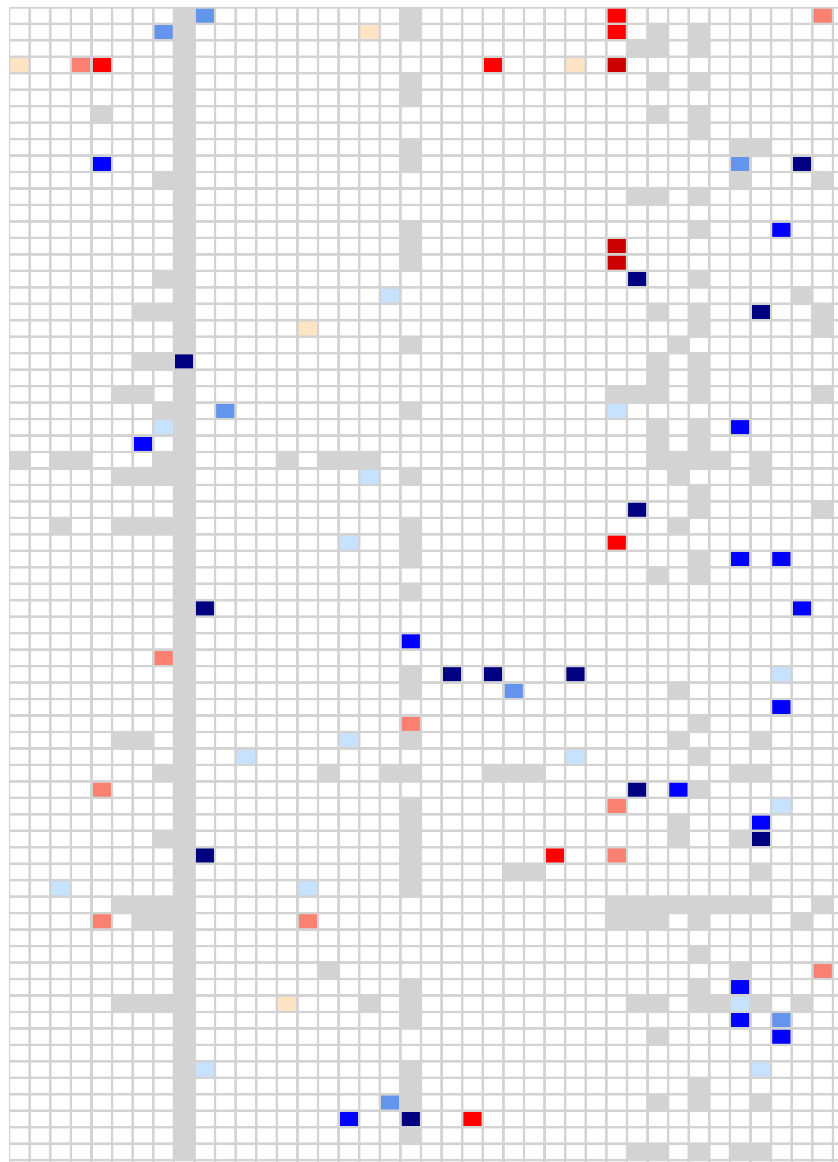

(Cfh-ZI)\_HOM\_NA (CBI\_106)  
 1810043G02Rik\_HOM\_tm1b (CBI\_106)  
 2610509F24Rik\_HOM\_tm1.1 (CBI\_107)  
 2810001G20Rik\_HOM\_tm1.1 (CBI\_106)  
 2810468N07Rik\_HOM\_tm1.1 (CBI\_106)  
 4930502E18Rik\_HEMI\_em1 (CBI\_106)  
 5330434G04Rik\_HEMI\_em1 (CBI\_107)  
 8030411F24Rik\_HOM\_tm2b (CBI\_107)  
 A830031A19Rik\_HOM\_tm1b (CBI\_106)  
 A830080D01Rik\_HEMI\_em1 (CBI\_106)  
 A930004D18Rik\_HOM\_tm1a (CBI\_107)  
 Abhd16a\_HOM\_tm1a (CBI\_107)  
 Adcy3\_HET\_tm1a (CBI\_106)  
 Adprh12\_HOM\_em1 (CBI\_106)  
 Agbl5\_HOM\_em1 (CBI\_106)  
 Akr1c20\_HOM\_tm1a (CBI\_106)  
 Ankh1\_HOM\_tm1a (CBI\_107)  
 Anxa8\_HOM\_em1 (CBI\_106)  
 Arhgap30\_HOM\_tm1a (CBI\_107)  
 Arpc1b\_HOM\_tm1a (CBI\_107)  
 Asxl3\_HOM\_em1 (CBI\_106)  
 Aut2\_HET\_em1 (CBI\_107)  
 B230312C02Rik\_HOM\_tm1.1 (CBI\_107)  
 Baz2b\_HOM\_em1 (CBI\_106)  
 Bbs2\_HET\_em1 (CBI\_106)  
 Bgain\_HOM\_tm1b (CBI\_107)  
 Bgn\_HEMI\_tm1.1 (CBI\_107)  
 Bin2\_HOM\_em1 (CBI\_107)  
 Bola3\_HET\_tm1b (CBI\_106)  
 Brcc3\_HEMI\_em1 (CBI\_107)  
 Btn2a2\_HOM\_em1 (CBI\_107)  
 Btnl2\_HOM\_em1 (CBI\_106)  
 C2cd4b\_HOM\_em1 (CBI\_106)  
 C8g\_HOM\_em1 (CBI\_106)  
 Camsap3\_HET\_tm1a (CBI\_107)  
 Cd160\_HOM\_em1 (CBI\_106)  
 Cd300c\_HOM\_em1 (CBI\_106)  
 Cd300d\_HOM\_em1 (CBI\_107)  
 Cd300d2\_HOM\_em1 (CBI\_106)  
 Cd96\_HOM\_em1 (CBI\_107)  
 Cdh23\_HOM\_tm2b (CBI\_106)  
 Cdy1\_HET\_em1 (CBI\_106)  
 Ceacam11\_HOM\_em1 (CBI\_106)  
 Ceacam12\_HOM\_em1 (CBI\_107)  
 Ceacam13\_HOM\_em1 (CBI\_106)  
 Ceacam14\_HOM\_em1 (CBI\_107)  
 Ceacam15\_HOM\_em1 (CBI\_106)  
 Ceacam3\_HOM\_em1 (CBI\_107)  
 Cell2\_HET\_tm1b (CBI\_106)  
 Cep120\_HET\_tm1b (CBI\_106)  
 Cep72\_HOM\_em1 (CBI\_106)  
 Clap44\_HOM\_tm1a (CBI\_106)  
 Clec4a3\_HOM\_tm1b (CBI\_106)  
 Clic3\_HET\_em1 (CBI\_106)  
 Cnih3\_HOM\_tm1a (CBI\_107)  
 Cntn6\_HOM\_em1 (CBI\_107)  
 Col4a2\_HET\_em1 (CBI\_106)  
 Cpgi1230\_HOM\_tm1.1 (CBI\_106)  
 Cpgi13101\_HOM\_tm1.1 (CBI\_106)  
 Cpgi13569\_HOM\_tm1.1 (CBI\_106)  
 Cpgi13569\_HOM\_tm1.1 (CBI\_107)  
 Cpgi15342\_HOM\_tm1.1 (CBI\_106)  
 Cpgi15344\_HOM\_tm1.1 (CBI\_106)  
 Cpgi15497\_HOM\_tm1.1 (CBI\_106)  
 Cpgi399\_HOM\_tm1.1 (CBI\_106)  
 Cpgi5176\_HOM\_tm1.1 (CBI\_106)  
 Cpgi5563\_HOM\_tm1.1 (CBI\_106)  
 Cpt1a\_HOM\_tm1.2 (CBI\_106)  
 Crip1\_HOM\_em1 (CBI\_106)  
 Crip2\_HOM\_tm1a (CBI\_107)

4\_TB\_area  
 4\_TB\_width  
 4\_TB\_height\_CS1  
 4\_TB\_height\_CS2  
 4\_Pons\_height  
 4\_IC\_area  
 4\_ICL\_area  
 4\_Med\_area  
 4\_Folia  
 4\_LV\_area  
 4\_cc\_height  
 4\_cc\_length  
 4\_cc\_area  
 4\_M1\_length  
 4\_M2\_length  
 4\_TCTX\_area  
 4\_Cg\_height  
 4\_Cg\_area  
 4\_TTh\_area  
 4\_CPU\_area  
 4\_Mol\_length  
 4\_Rad\_length  
 4\_Or\_length  
 4\_HP\_area  
 4\_Tilpy\_length  
 4\_Tilpy\_area  
 4\_DG\_length  
 4\_DG\_area  
 4\_fi\_area  
 4\_aca\_area  
 4\_sm\_area  
 4\_L\_area  
 4\_och\_area  
 4\_fm\_area  
 4\_Pn\_area  
 4\_SN\_area  
 4\_DS\_area  
 4\_InIC\_area  
 4\_SupC\_area

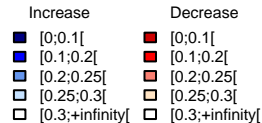

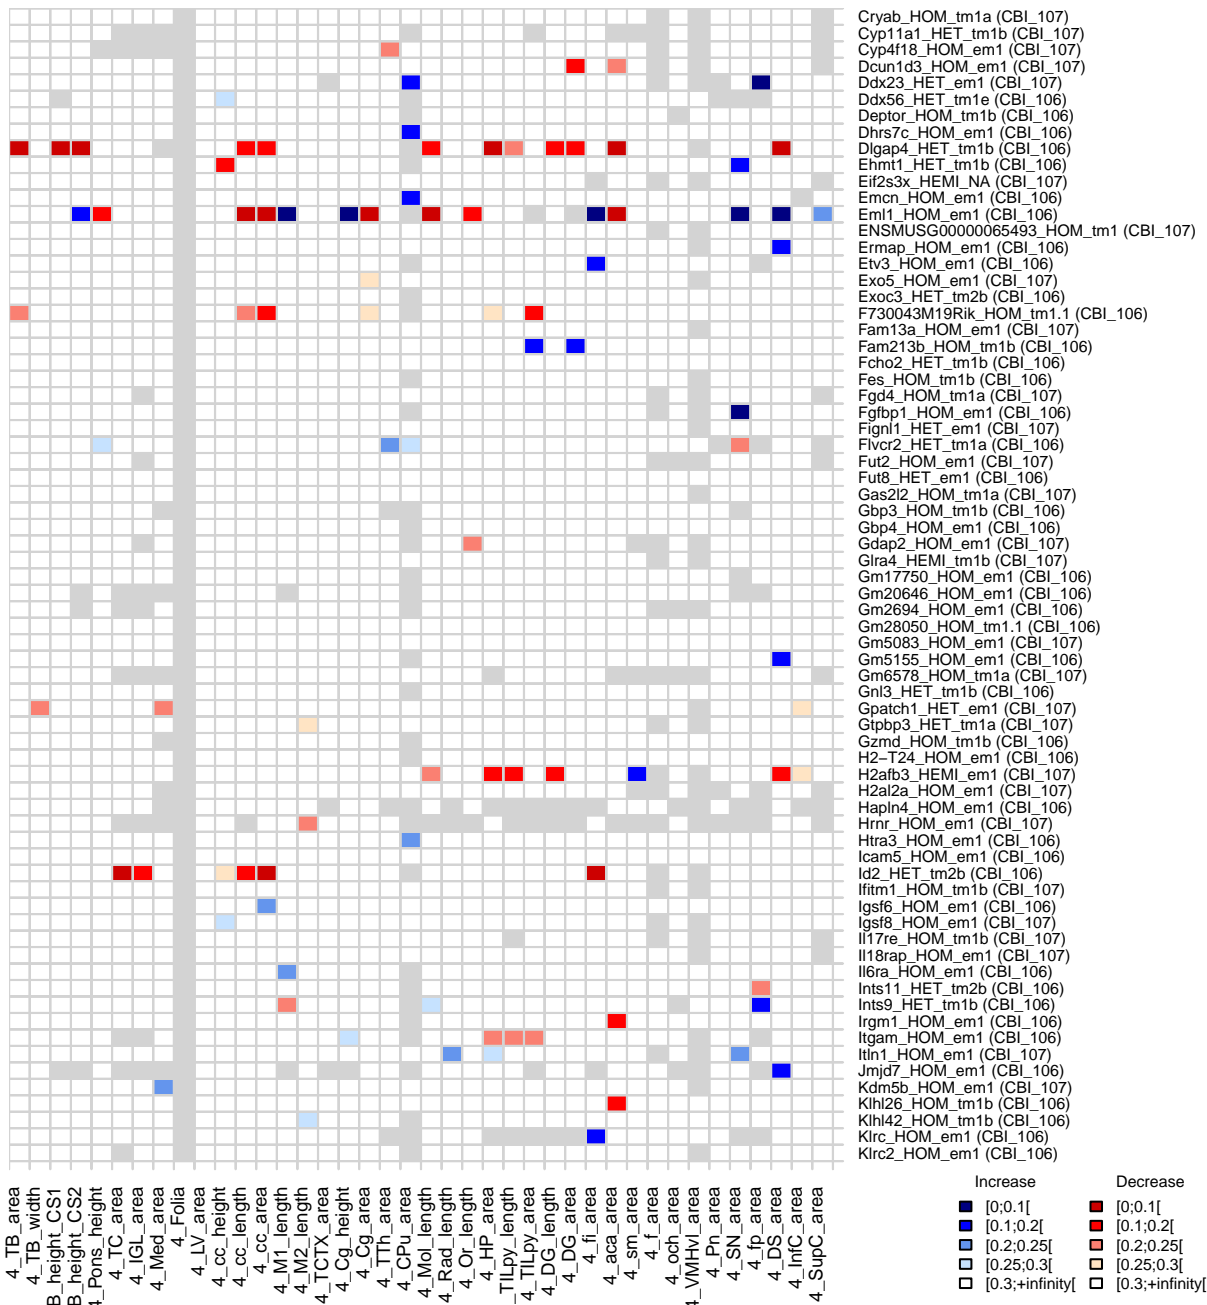

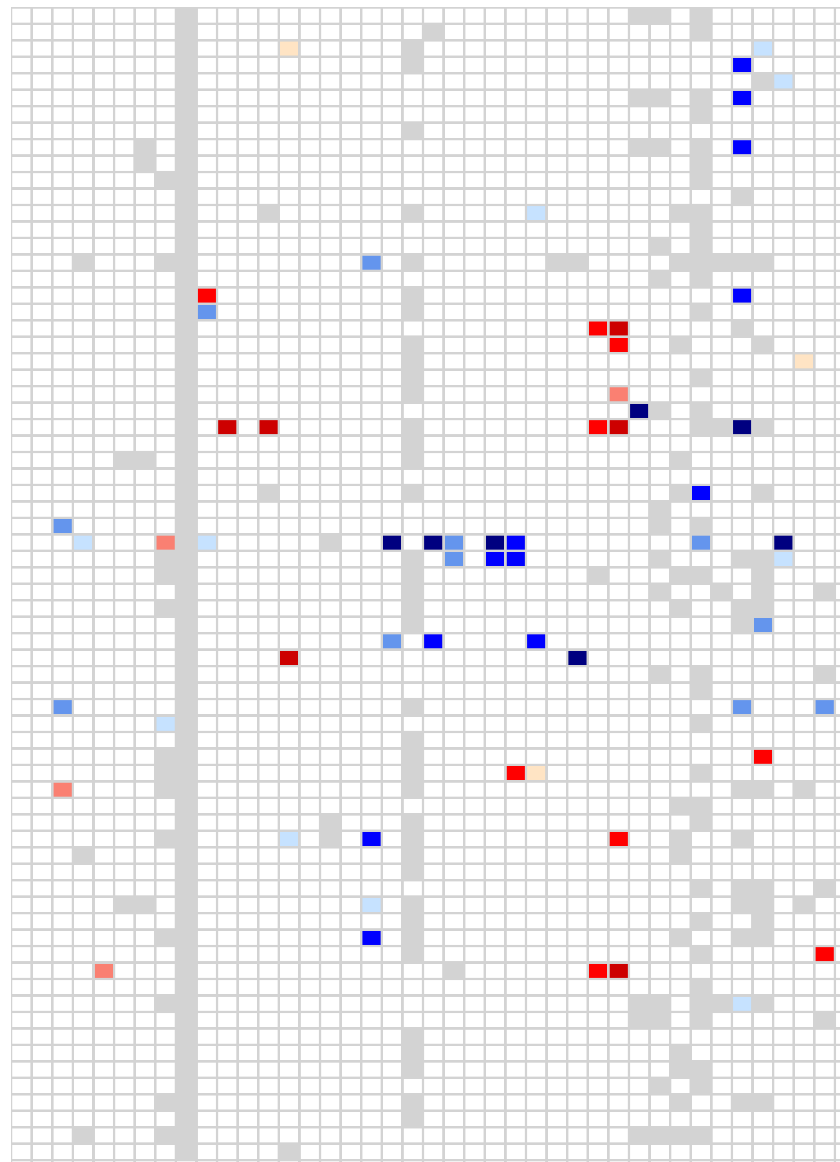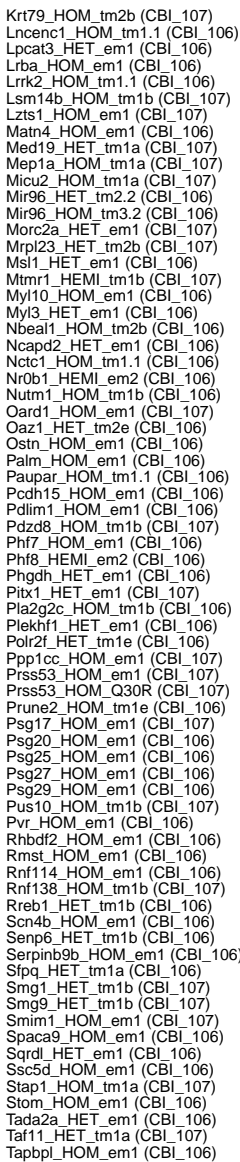

4\_TB\_area  
 4\_TB\_width  
 TB\_height\_CS1  
 TB\_height\_CS2  
 4\_Pons\_height  
 4\_IC\_area  
 4\_JGL\_area  
 4\_Med\_area  
 4\_Folia  
 4\_LV\_area  
 4\_cc\_height  
 4\_cc\_length  
 4\_cc\_area  
 4\_M1\_length  
 4\_M2\_length  
 4\_TCTX\_area  
 4\_Cg\_height  
 4\_Cg\_area  
 4\_TTh\_area  
 4\_CFu\_area  
 4\_Mol\_length  
 4\_Rad\_length  
 4\_Or\_length  
 4\_HP\_area  
 4\_Tilpy\_length  
 4\_TILpy\_area  
 4\_DG\_length  
 4\_DG\_area  
 4\_fi\_area  
 4\_aca\_area  
 4\_sm\_area  
 4\_L\_area  
 4\_och\_area  
 4\_VMHV\_area  
 4\_Pn\_area  
 4\_SN\_area  
 4\_fp\_area  
 4\_DS\_area  
 4\_InIC\_area  
 4\_SupC\_area



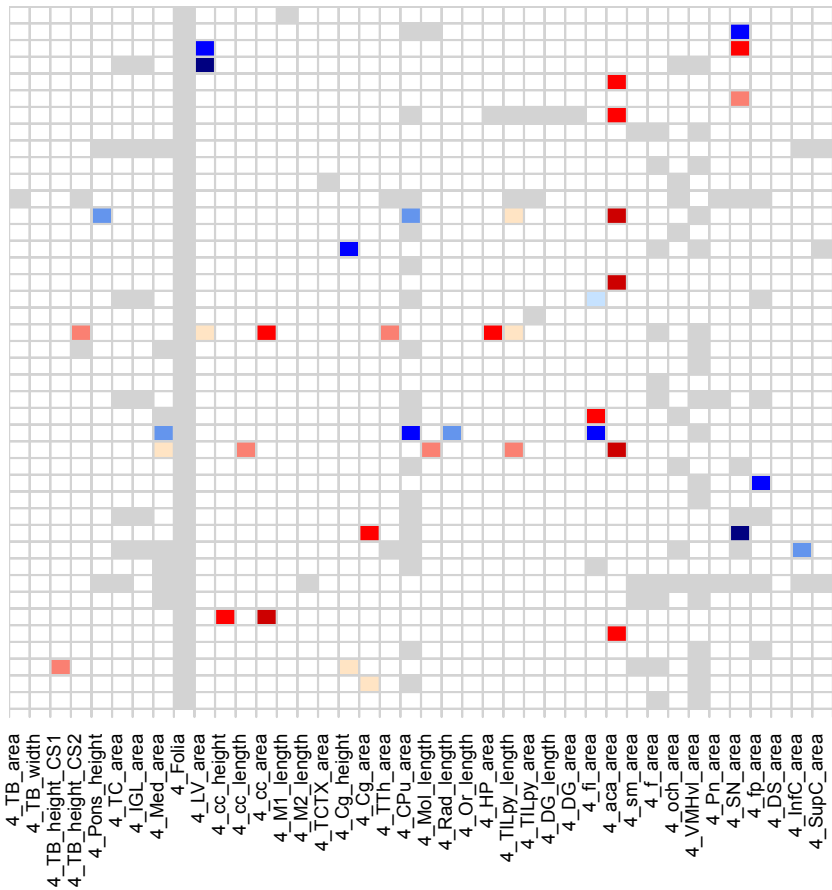

Tapbp1\_HOM\_em1 (CBI\_106)  
 Tcerg1l\_HOM\_tm1a (CBI\_106)  
 Tcf20\_HOM\_em1 (CBI\_106)  
 Tctex1d2\_HOM\_tm2b (CBI\_106)  
 Tex261\_HOM\_tm1b (CBI\_106)  
 Tgm3\_HOM\_em3 (CBI\_106)  
 Tial1\_HET\_tm1b (CBI\_106)  
 Tigar\_HOM\_tm1b (CBI\_107)  
 Tlr11\_HOM\_em1 (CBI\_107)  
 Tlr12\_HOM\_em1 (CBI\_107)  
 Tmco2\_HOM\_tm1a (CBI\_106)  
 Tmem211\_HOM\_tm1b (CBI\_106)  
 Tmem260\_HOM\_tm1a (CBI\_106)  
 Tmem74b\_HOM\_tm1e (CBI\_106)  
 Tmprss11c\_HOM\_tm2b (CBI\_107)  
 Tnfrsf18\_HOM\_tm1b (CBI\_106)  
 Trbv19\_HOM\_em1 (CBI\_106)  
 Trim6\_HET\_em1 (CBI\_106)  
 Trim6\_HOM\_em1 (CBI\_106)  
 Trim8\_HOM\_em1 (CBI\_107)  
 Trps1\_HET\_em1 (CBI\_106)  
 Tsk5\_HOM\_em1 (CBI\_106)  
 Ttl10\_HOM\_tm1b (CBI\_106)  
 Ube2f\_HET\_tm1b (CBI\_106)  
 Upk1b\_HET\_tm1b (CBI\_106)  
 Usp13\_HOM\_tm1b (CBI\_106)  
 Usp15\_HOM\_tm1b (CBI\_106)  
 Usp19\_HET\_tm1b (CBI\_106)  
 Usp44\_HOM\_tm1b (CBI\_107)  
 Usp51\_HEM\_em1 (CBI\_106)  
 Vmn2r27\_HOM\_em1 (CBI\_106)  
 Vpreb3\_HOM\_em1 (CBI\_106)  
 Vrk1\_HOM\_em1 (CBI\_106)  
 Vsig10\_HOM\_em1 (CBI\_106)  
 Wac\_HET\_tm1b (CBI\_107)  
 Wfikkn2\_HOM\_tm1b (CBI\_107)  
 Zc3h14\_HOM\_tm1a (CBI\_106)  
 Zochc11\_HOM\_tm1a (CBI\_106)  
 Zfp54\_HOM\_em1 (CBI\_106)  
 Zfp664\_HOM\_tm1b (CBI\_107)  
 Zfp748\_HOM\_em1 (CBI\_106)  
 Zmynd11\_HET\_em1 (CBI\_107)

Increase  
 Decrease

|                   |                   |
|-------------------|-------------------|
| ■ [0;0.1[         | ■ [0;0.1[         |
| ■ [0.1;0.2[       | ■ [0.1;0.2[       |
| ■ [0.2;0.25[      | ■ [0.2;0.25[      |
| ■ [0.25;0.3[      | ■ [0.25;0.3[      |
| □ [0.3;+infinity[ | □ [0.3;+infinity[ |
